# Supplementary material for: Optogenetic engineering to probe the molecular choreography of STIM1-mediated cell signaling
Source: PubMed Central journal article supplement (PMC7042325; doi:10.1038/s41467-020-14841-9), 2020-02-25
Supplement: 41467_2020_14841_MOESM1_ESM.pdf [file 41467_2020_14841_MOESM1_ESM.pdf]

# Supporting information for

## **Optogenetic engineering to probe the molecular choreography of STIM1-mediated cell signaling**

Guolin Ma, Lian He, Shuzhong Liu, Jiansheng Xie, Zixian Huang, Ji Jing, Yi-Tsang Lee, Rui Wang, Hesheng Luo, Weidong Han, Yun Huang, Yubin Zhou

### **Contents:**

Supplementary Figures 1-19

Supplementary Table 1

Supplementary References

**a**

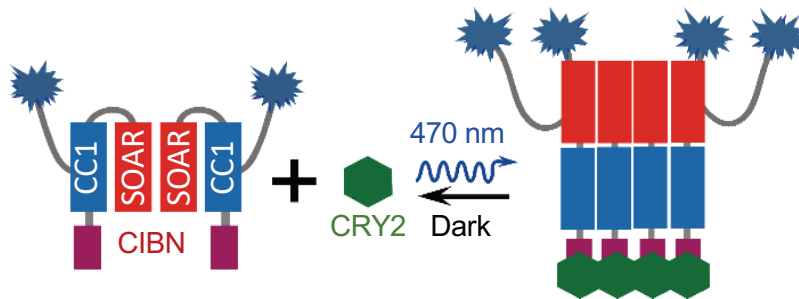

**b**

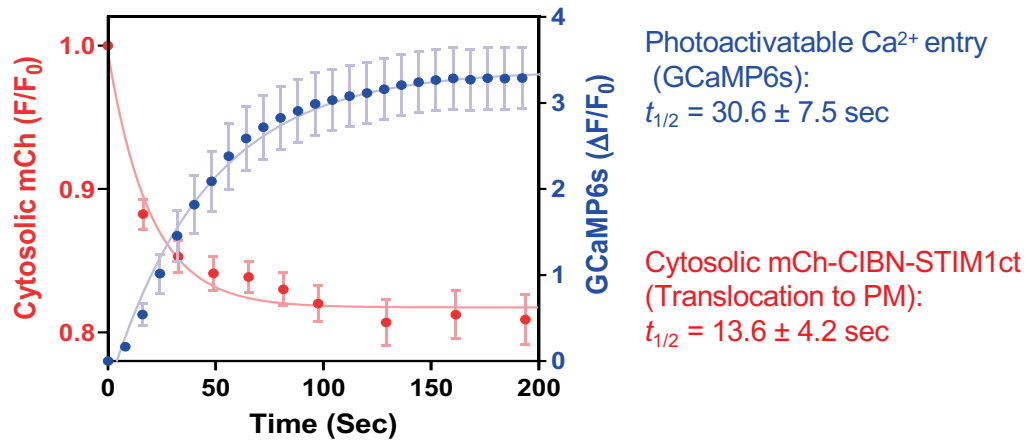

**Supplementary Figure 1 | Use of CRY2 as an optical crosslinker to trigger the cytosol-to-PM translocation of CIBN-STIM1ct and the subsequent Ca<sup>2+</sup> entry through ORAI channels. (Related to Fig. 1)**

(a) Schematic of the design. (b) Time courses showing the cytosol-to-PM translocation of CIBN-STIM1ct (red) and light-elicited Ca<sup>2+</sup> influx (blue) in HeLa cells co-transfected with CFP-ORAI1, CRY2-P2A-mCh-CIBN-STIM1ct and GCaMP6s. The corresponding half-lives ( $t_{1/2}$ ) were listed on the right.  $n = 30$  cells from three independent experiments (mean  $\pm$  sem).

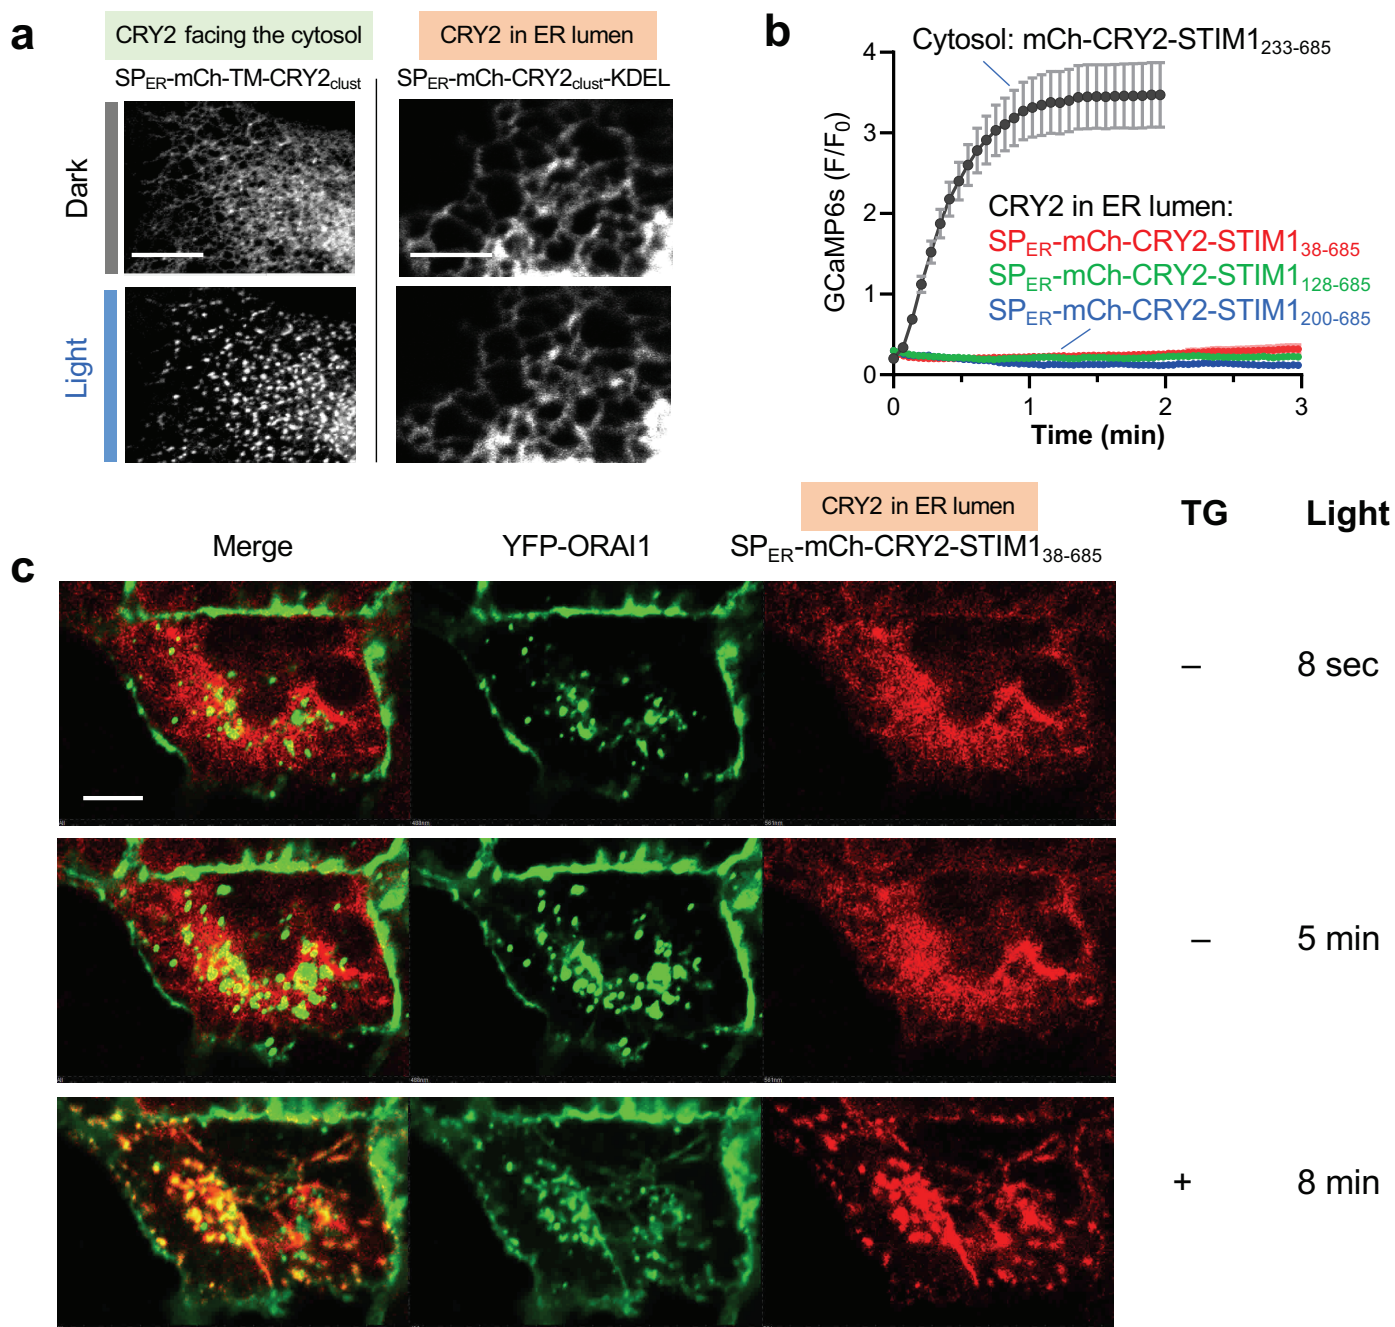

**Supplementary Figure 2 | Photoactivation of CRY2 is environmentally sensitive. (Related to Fig. 1)**

(a) Representative confocal images showing COS-7 cells expressing ER-anchored SP<sub>ER</sub>-mCh-STIM1<sub>209-214</sub>, TM-CRY2<sub>clust</sub> (*left*) or ER lumen-resident SP<sub>ER</sub>-mCh-CRY2<sub>clust</sub>-KDEL (*right*) before and after blue light illumination. Scale bar, 5 μm.

(b) Light-triggered Ca<sup>2+</sup> responses for the indicated mCh-CRY2-STIM1ct variants. n = 30 cells. Data were shown as mean ± sem.

(c) Confocal images showing a HeLa cell cotransfected with YFP-ORAI1 and SP<sub>ER</sub>-mCh-CRY2-STIM1<sub>38-685</sub> before and after light illumination (470 nm; 5 min) with and without TG stimulation. Scale bar, 5 μm.

**NOTE:** SP<sub>ER</sub>-mCh-TM-CRY2<sub>clust</sub> (with CRY2 facing the cytosol), but not SP<sub>ER</sub>-mCh-CRY2<sub>clust</sub>-KDEL in the ER lumen, formed clusters along ER tubules after photo-stimulation. We reason that blue light illumination cannot effectively reduce CRY2 in the more oxidative ER lumen to photoactivate CRY2 (redox potential: -118 mV in the ER lumen<sup>[1]</sup> versus -300 mV in the cytosol<sup>[2-3]</sup>). Therefore, CRY2-STIM1 chimeras with CRY2 in the ER lumen invariably failed to photo-trigger Ca<sup>2+</sup> influx.

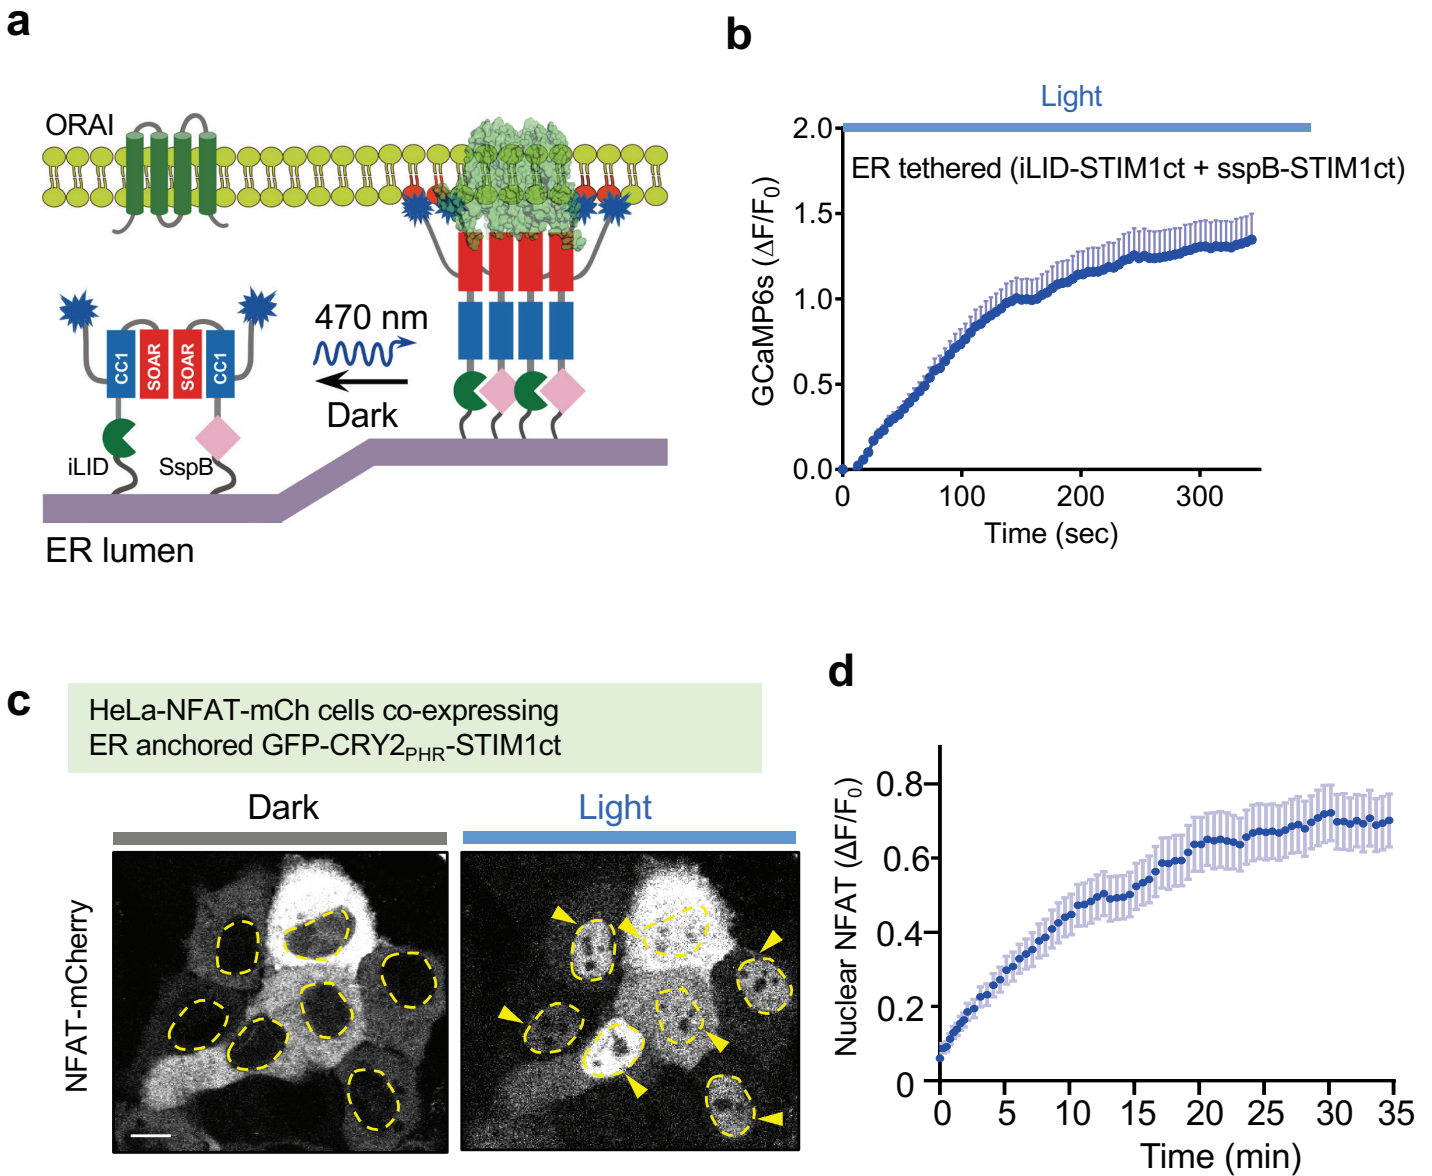

**Supplementary Figure 3 | Optical control of homo- or heterodimerization of ER-anchored, engineered STIM1ct to trigger  $Ca^{2+}$  influx and NFAT nuclear entry. (Related to Fig. 1)**

(a-b) Use of ER-tethered optical dimerizer (iLID + sspB) to drive STIM1ct activation with light.

(a) Schematic of the design. (b) A representative light-induced  $Ca^{2+}$  response curve in HeLa cells expressing iLID-STIM1ct and sspB-STIM1ct.  $n = 24$  (mean  $\pm$  sem).

(c) Light-induced nuclear translocation of NFAT-mCherry in HeLa cells expressing ER localized GFP-CRY2<sub>PHR</sub>-STIM1ct. The HeLa cells were subjected to blue light illumination for 20 min (pulsed cycles of 30 s ON + 120 s OFF). Representative images were shown before and after light illumination (470 nm, 4 mW/cm<sup>2</sup>, blue bar). Arrows: nuclear NFAT-mCherry (mCh). Scale bar, 10  $\mu$ m.

(d) The time course of light-induced NFAT nuclear translocation shown in panel c.  $n = 12$  cells (mean  $\pm$  sem.).

**a**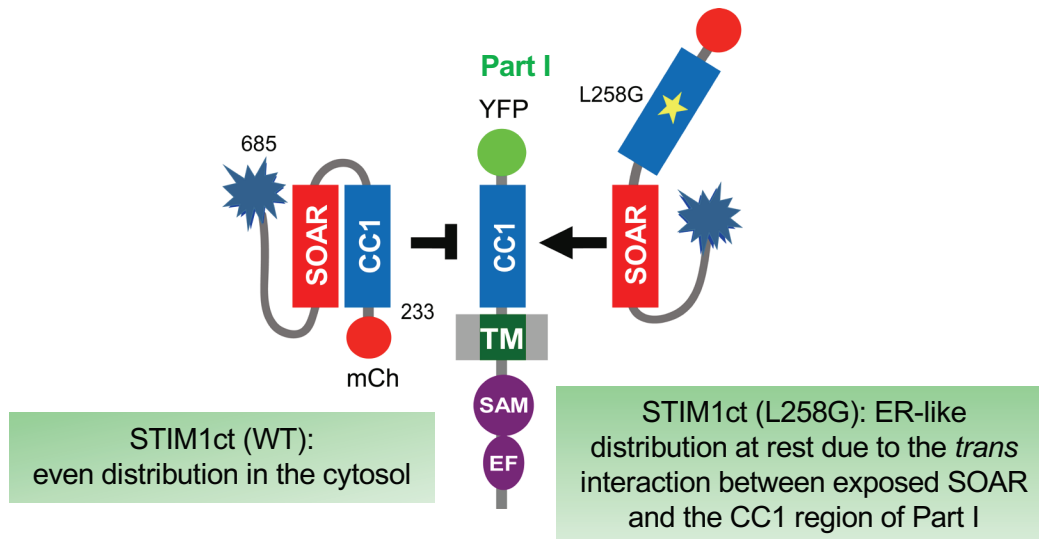**b**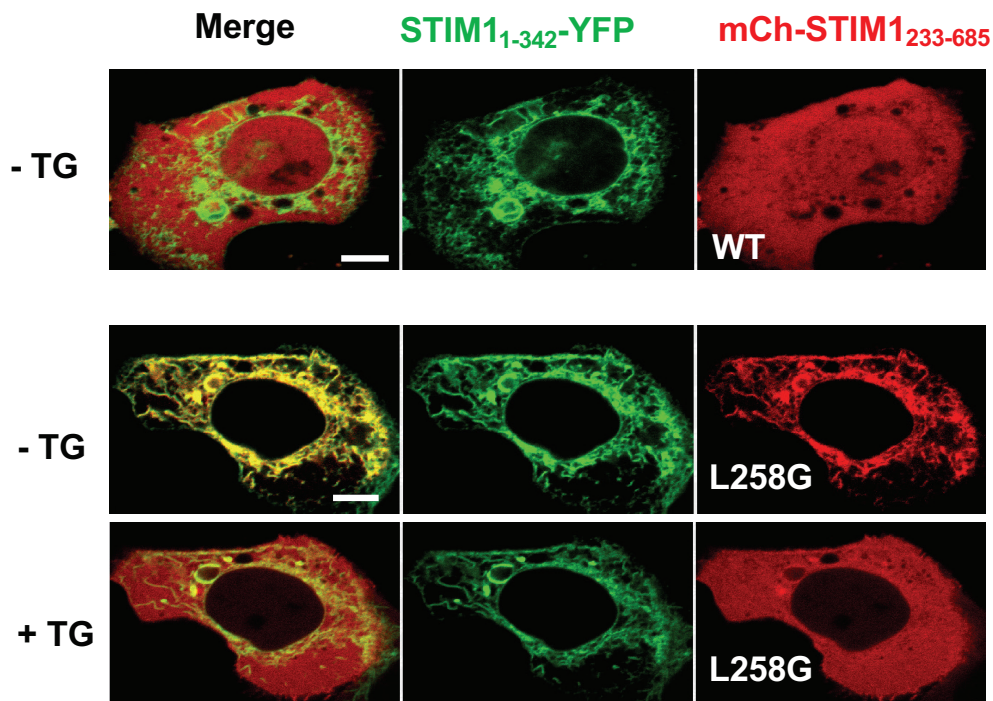

**Supplementary Figure 4 | CC1-SOAR interaction mediates STIM1ct autoinhibition. (Related to Fig. 2)**

(a) Schematic illustration of STIM1ct autoinhibition mediated by the interaction between CC1 and SOAR domains. ER anchored CC1 domain (Part I: STIM1<sub>1-342</sub>-YFP) failed to capture mCh-tagged STIM1ct (WT) but tightly interacted with the STIM1ct-L258G mutant. The L258G mutation disrupts the intramolecular CC1-SOAR interaction (*cis*), thus exposing the SOAR domain to enable its *trans* interaction with CC1 in Part I.

(b) Representative confocal images of HeLa cells expressing ER anchored STIM1<sub>1-342</sub>-YFP (Part I) and mCh-STIM1ct (WT, top panel) or STIM1ct-L258G (middle and bottom panel). 1  $\mu$ M thapsigargin (TG) was used to trigger Ca<sup>2+</sup> store depletion in the ER. Scale bar, 5  $\mu$ m.

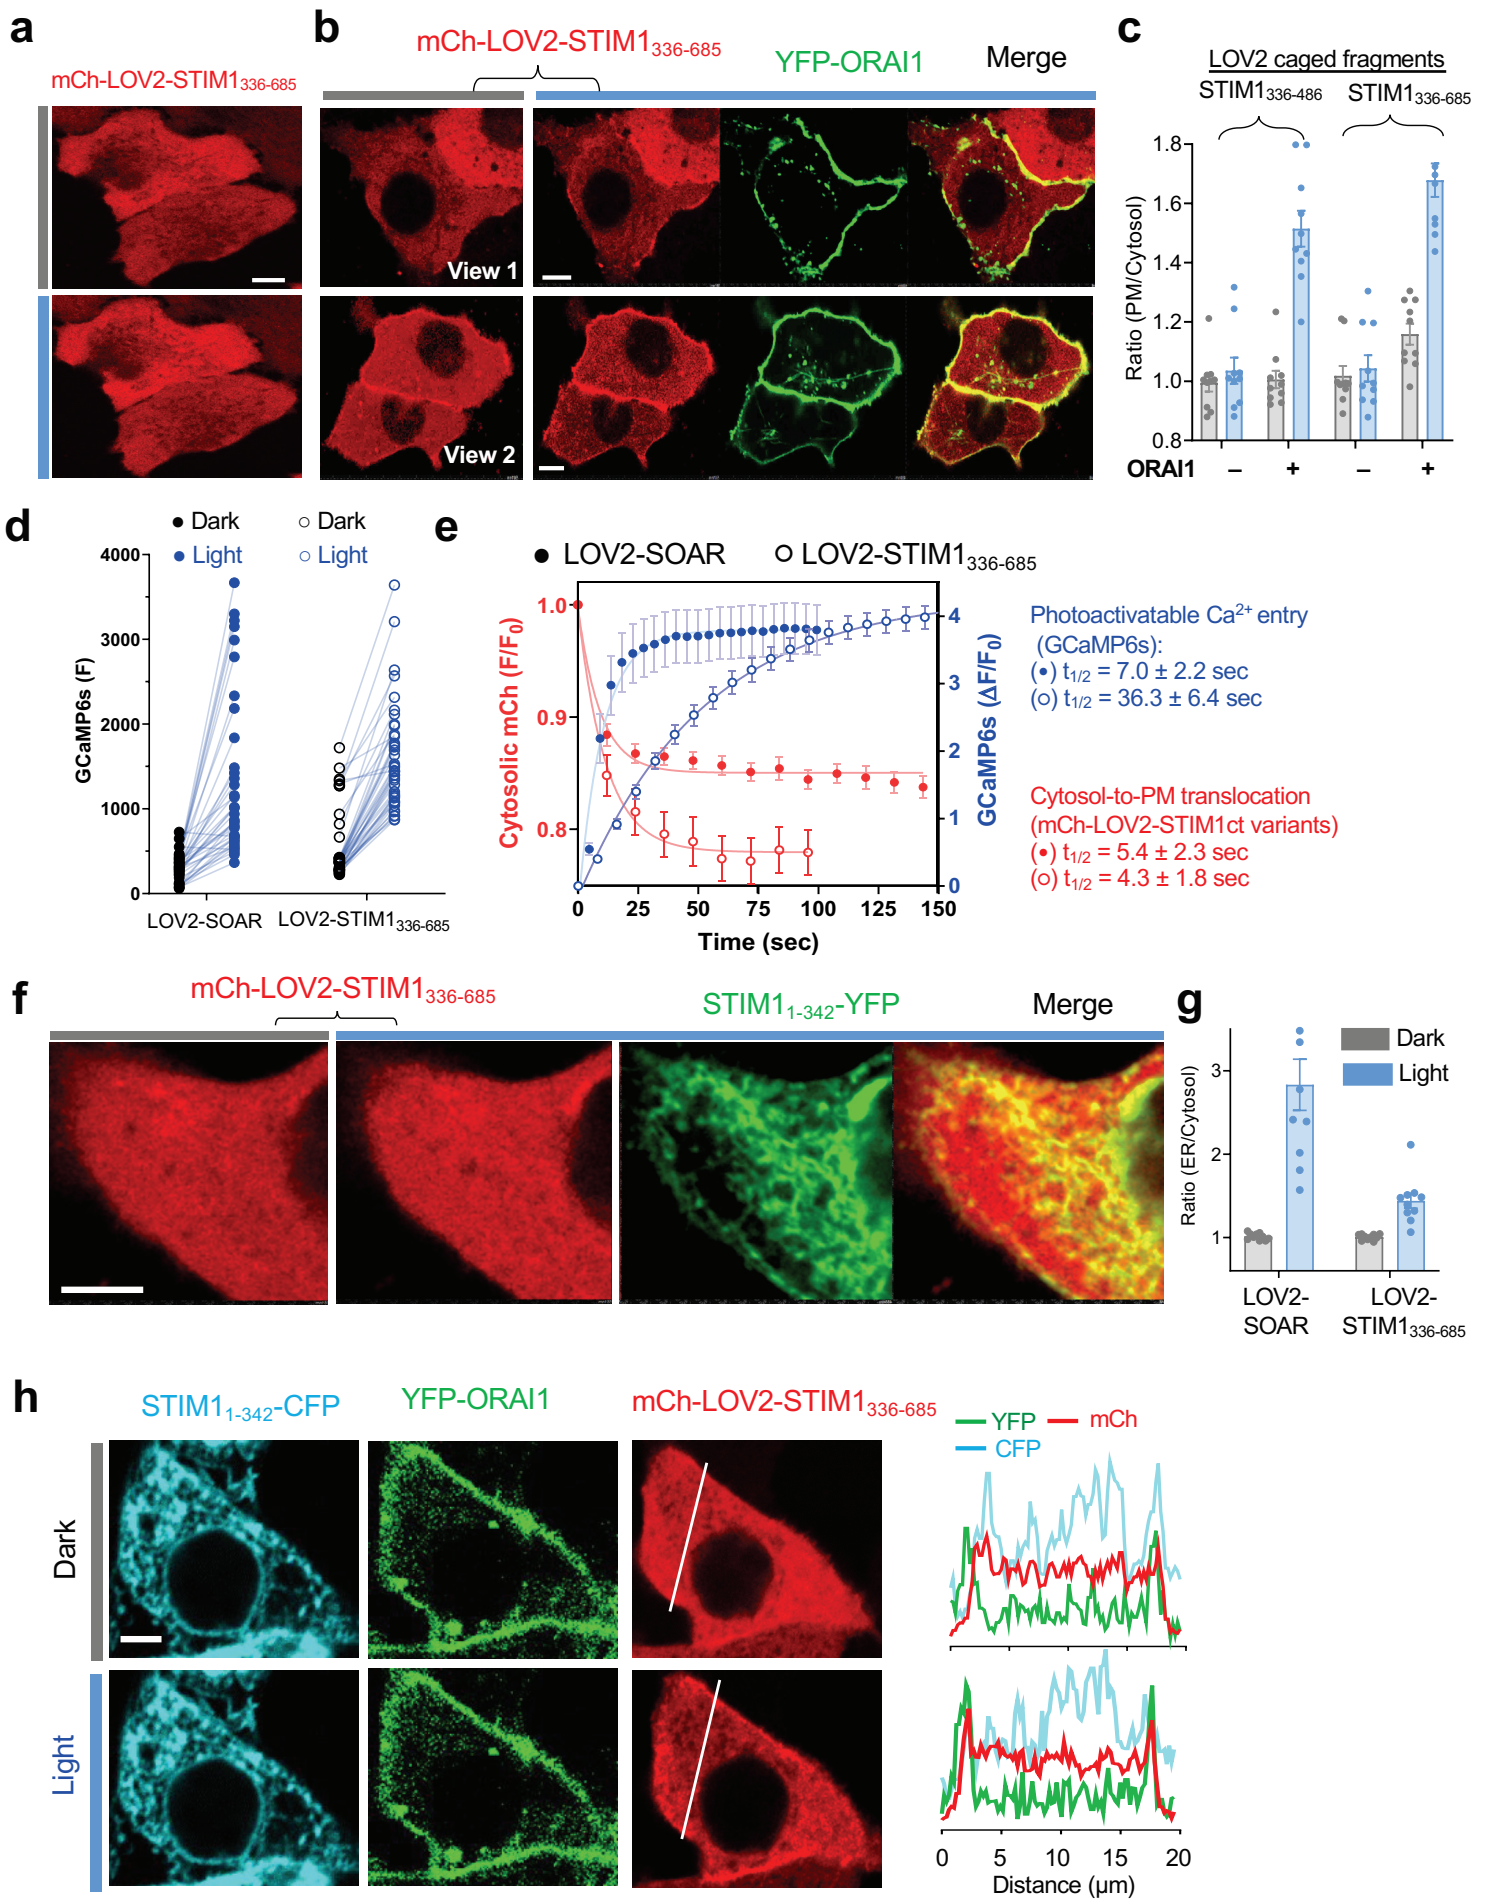

### Supplementary Figure 5 | Characterization of LOV2 caged STIM1 fragments. (Related to Fig. 2)

Scale bar, 5  $\mu\text{m}$ . Error bar denote sem.

(a) Representative confocal images of HeLa cells expressing mCh-LOV2-STIM1<sub>336-685</sub> before and after blue light illumination (470 nm, 5 min).

(b) Representative confocal images showing HeLa cells co-expressing mCh-LOV2-STIM1<sub>336-685</sub> and YFP-ORAI1 in the dark (two views with the bottom panel showing partial PM decoration), or after blue light stimulation (blue bar).

(c) Summary of the degrees of cytosol-to-PM translocation of the indicated constructs (LOV2-STIM1<sub>336-486</sub> [abbreviated as LOV2-SOAR] and LOV2-STIM1<sub>336-685</sub>) in the absence or presence of YFP-ORAI expression. n = 10 cells.

(d) Comparison of cytosolic Ca<sup>2+</sup> levels reported by GCaMP6s in HeLa cells expressing mCh-LOV2-SOAR (●) or mCh-LOV2-STIM1<sub>336-685</sub> (○) before and after blue light illumination. Some cells transfected with mCh-LOV2-STIM1<sub>336-685</sub> showed pre-activation with higher basal GCaMP6s signals in the dark. n = 38 cells.

(e) The time courses showing the kinetics of cytosol-to-PM translocation (red) and Ca<sup>2+</sup> influx (blue) for mCh-LOV2-SOAR (●) or mCh-LOV2-STIM1<sub>336-685</sub> (○). HeLa cells were cotransfected with ORAI1-CFP and GCaMP6s. The half-lives ( $t_{1/2}$ ) were listed on the right. n = 12 cells for PM translocation; n = 24 cells for the Ca<sup>2+</sup> influx assay.

(f-g) Representative confocal images (f) of HeLa cells co-expressing mCh-LOV2-STIM1<sub>336-685</sub> and STIM1<sub>1-342</sub>-YFP. The quantification of ER-bound versus cytosolic mCh-tagged protein was shown in panel g. n = 10 cells.

(h) Confocal images of HeLa cells co-expressing mCh-LOV2-STIM1<sub>336-685</sub> (red), YFP-ORAI1 (green) and STIM1<sub>1-342</sub>-CFP (cyan). In the dark, mCh-LOV2-STIM1<sub>336-685</sub> was evenly distributed in the cytosol. Upon photostimulation, mCh-LOV2-STIM1<sub>336-685</sub> primarily translocated toward PM. The fluorescence intensities (YFP, green; mCh, red; CFP, cyan) across the dashed line were plotted to evaluate the degree of colocalization.

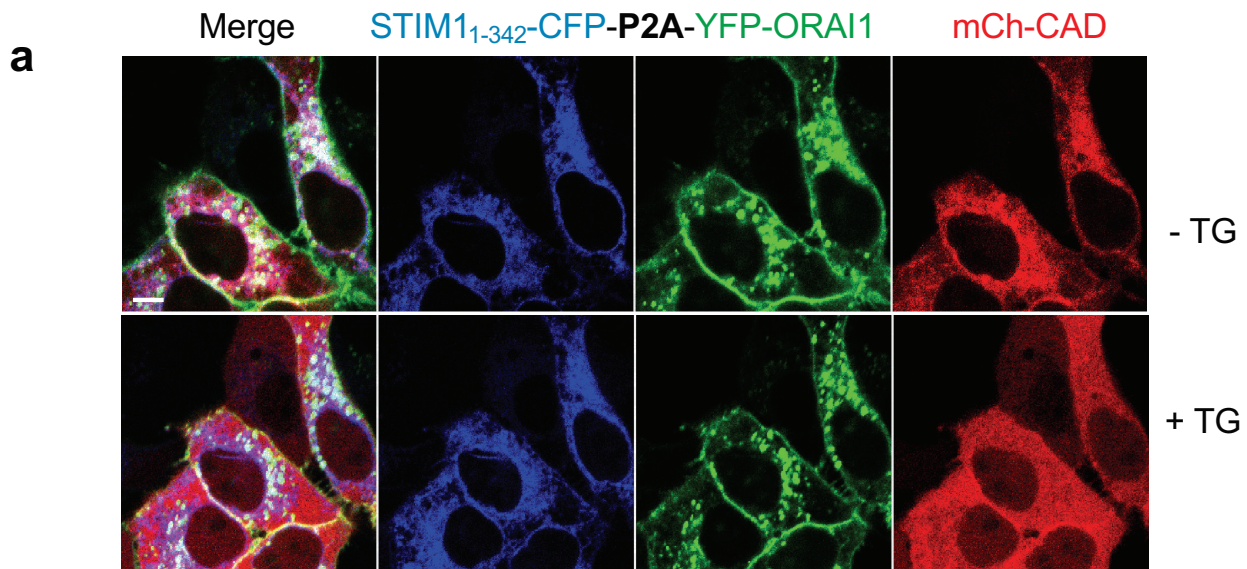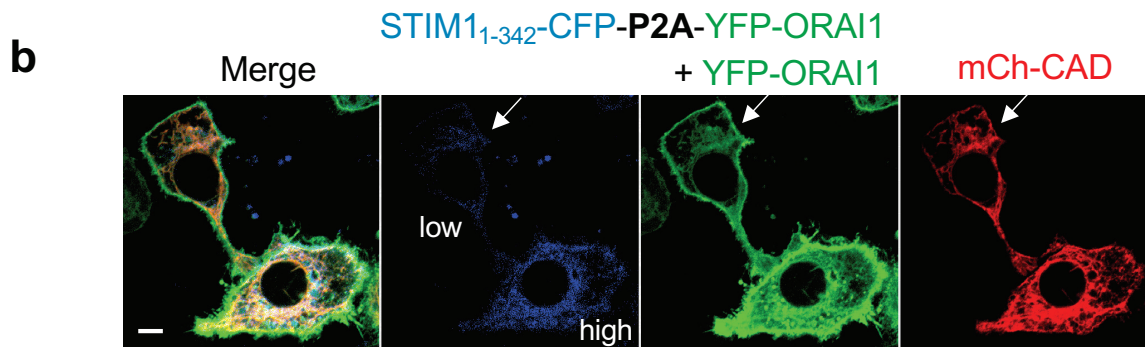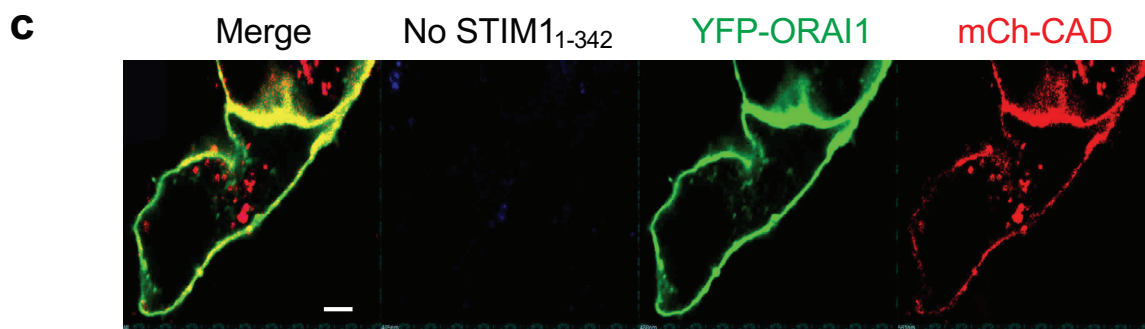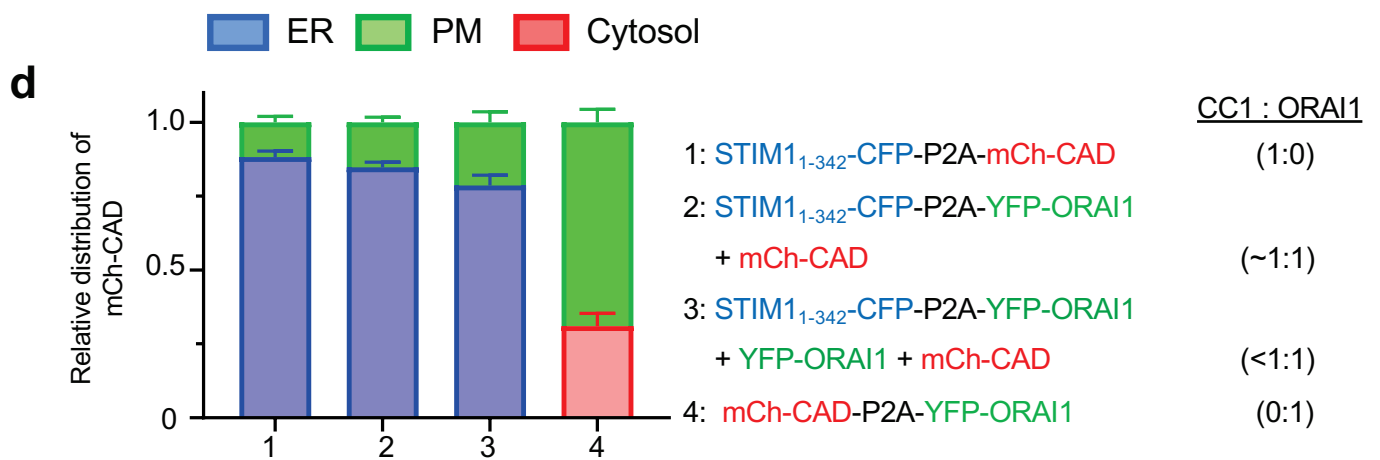



**Supplementary Figure 6 | A ‘tug-of-war’ between ER-resident CC1 (STIM1<sub>1-342</sub>) and PM-embedded ORAI1 to engage SOAR/CAD expressed in the cytosol.** (Related to Fig. 2) Scale bar, 5  $\mu$ m. Error bars denote sem.

(a) Representative confocal images of HeLa cells co-expressing STIM1<sub>1-342</sub>-CFP-P2A-YFP-ORAI1 and mCh-CAD before and after 1  $\mu$ M TG. mCh-CAD showed an ER-like tubular distribution at rest but was dispersed into the cytosol after TG-induced store depletion.

(b) Confocal images showing HeLa cells expressing STIM1<sub>1-342</sub>-CFP-P2A-YFP-ORAI1, YFP-ORAI1 and mCh-CAD. mCh-CAD decorated both ER tubular structures and PM. The upper left cell had low expression of STIM1<sub>1-342</sub>-CFP whereas the bottom right cell had higher STIM1<sub>1-342</sub>-CFP levels (hence more ER-docked mCh-CAD).

(c) Confocal images of HeLa cells expressing mCh-CAD-P2A-YFP-ORAI1. mCh-CAD showed a predominant decoration surrounding the PM.

(d) Quantification of the relative subcellular distribution of mCh-CAD in HeLa cells expressing STIM1<sub>1-342</sub> and YFP-ORAI1 at varying ratios. n = 10 cells.

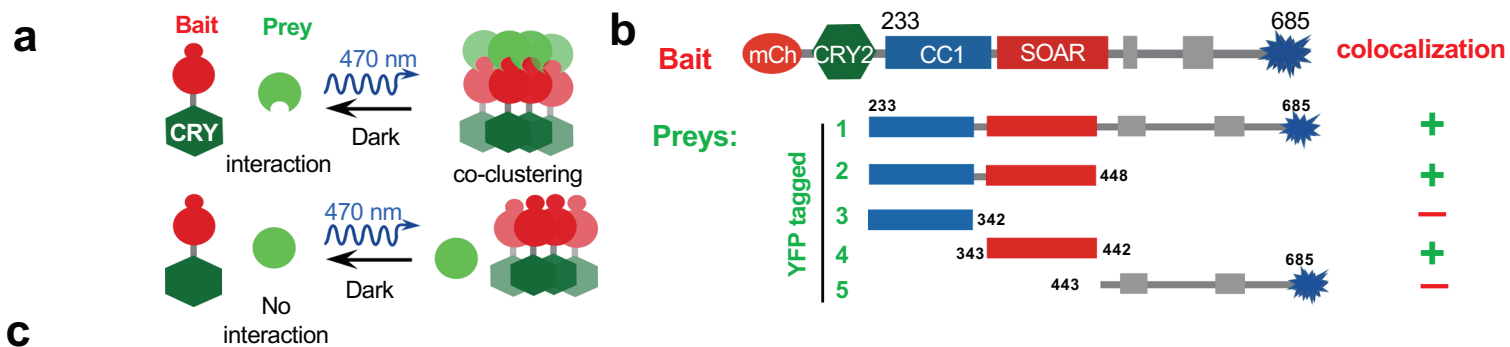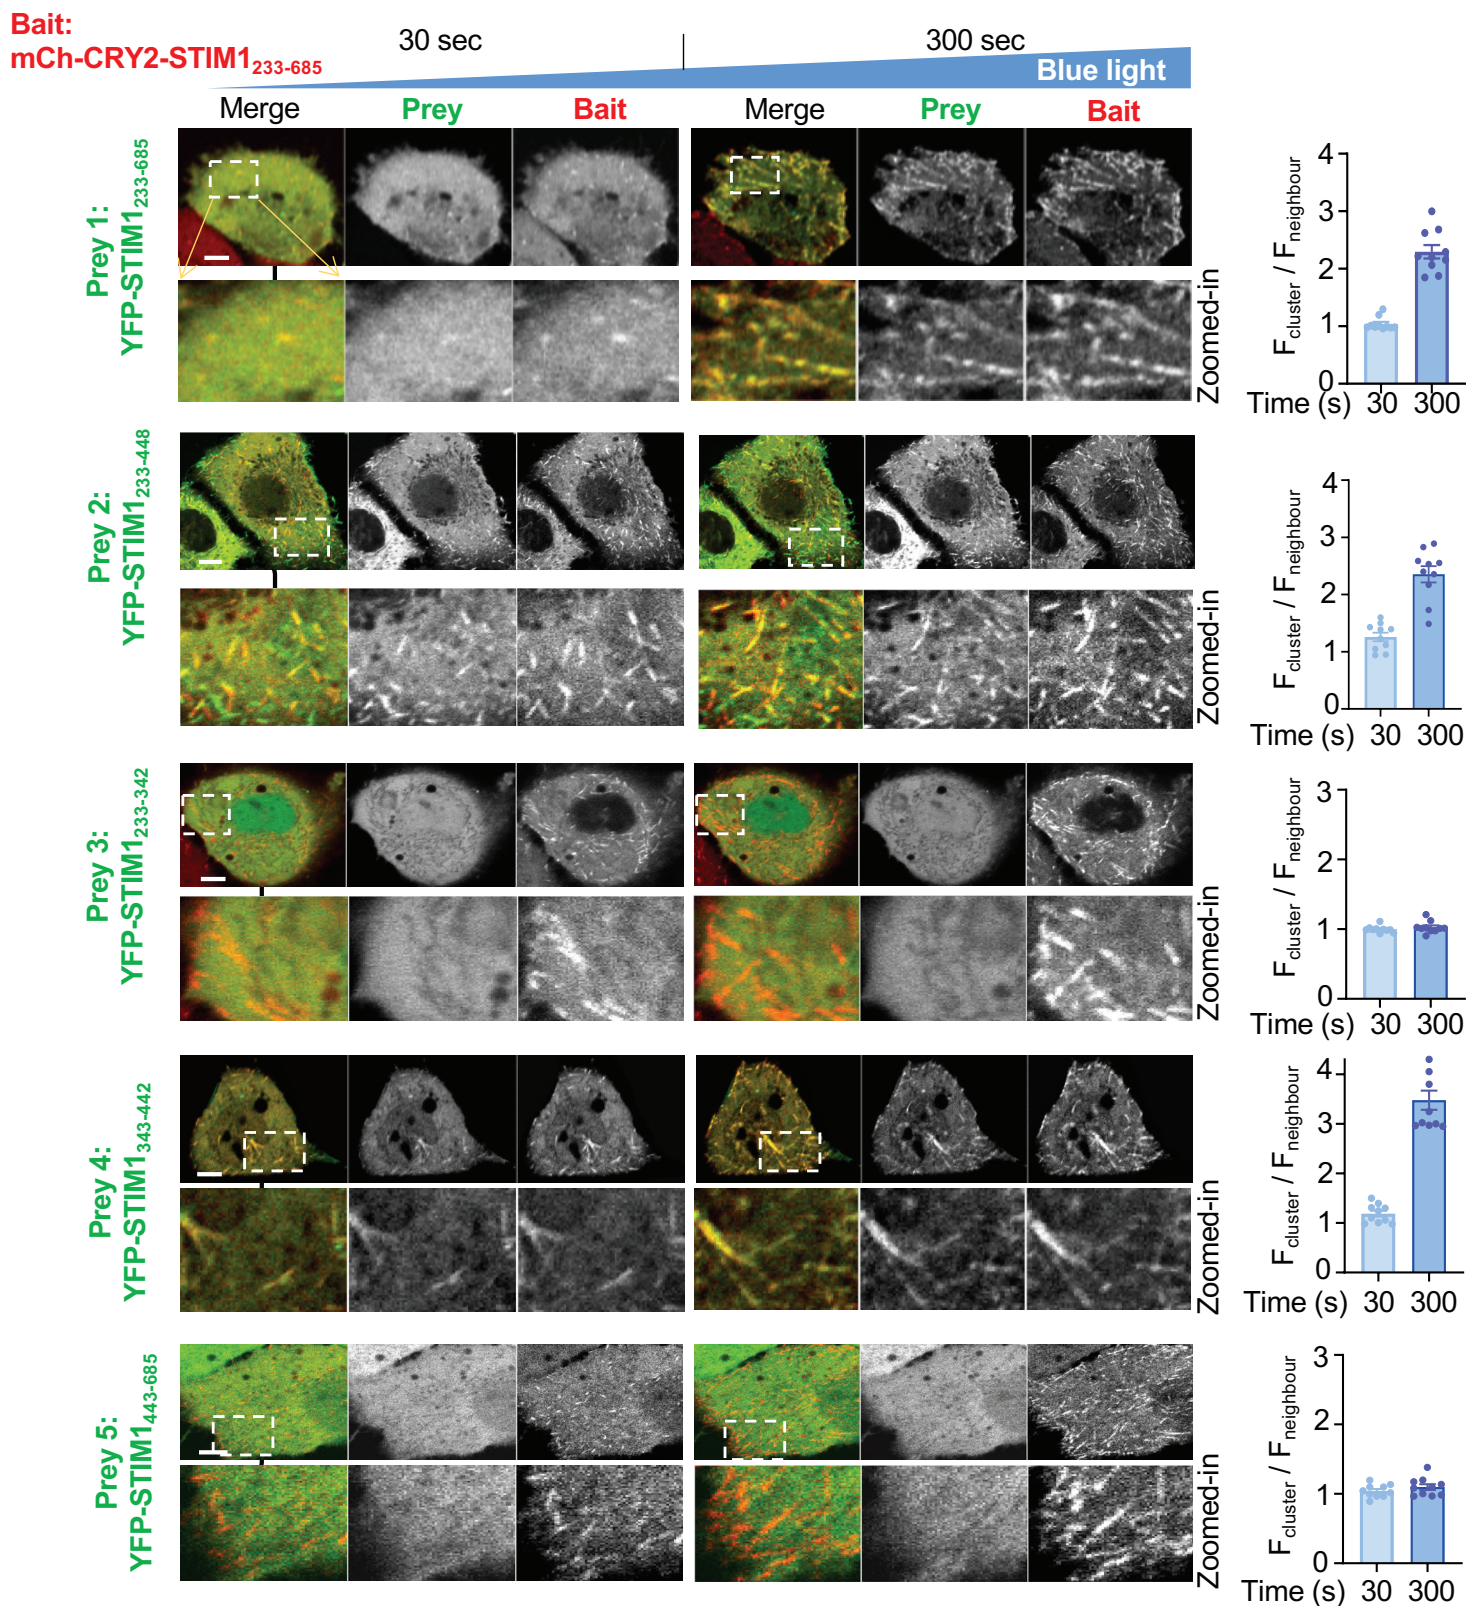

**Supplementary Figure 7 | Light inducible co-localization of mCh-CRY2-STIM1<sub>233-685</sub> (bait) with YFP-tagged STIM1ct fragments (preys). (Related to Fig. 4)**

(a-b) Schematic of the design (a) and constructs used in the optogenetic co-localization assay. “+”, light-induced bait-prey co-clustering observed based on images shown in panel c; “-”, no co-clustering observed.

(c) Representative confocal images of HeLa cells co-expressing the bait (mCherry-CRY2-STIM1<sub>233-685</sub>) and the indicated preys (YFP tagged STIM1ct fragments; preys 1-5) under blue light illumination (30 sec and 300 sec). Zoomed-in views of the boxed regions were also shown below the corresponding images. Quantification of the degrees of light-inducible co-clustering for the indicated preys were shown on the right. n = 10 cells. Error bars denote sem.

**NOTE:** Because the bait contains the S/TxIP EB1-binding motif (STIM1<sub>642-645</sub> targeting EB1, a microtubule plus-end tracking protein), mCh-CRY2-STIM1<sub>233-685</sub> exhibited comet-like distribution by tracking the plus ends of microtubules, rather than aggregation as seen with the other two baits in **Supplementary Figs. 8 and 9**, upon photoactivation. Only Preys 1, 2, and 4 containing the SOAR domain showed co-localization with the bait after blue light irradiation. Scale bar, 5  $\mu$ m.

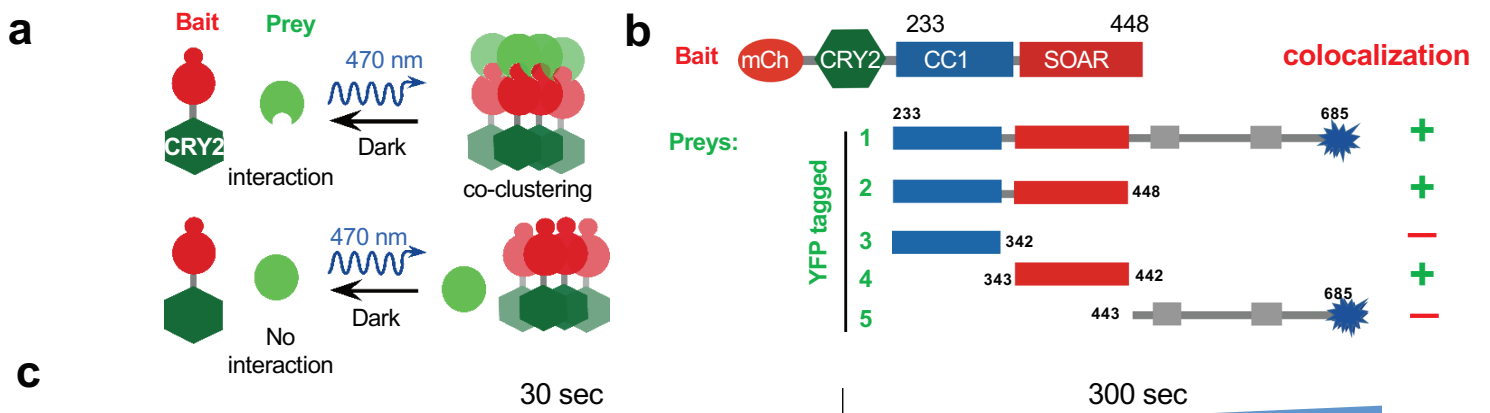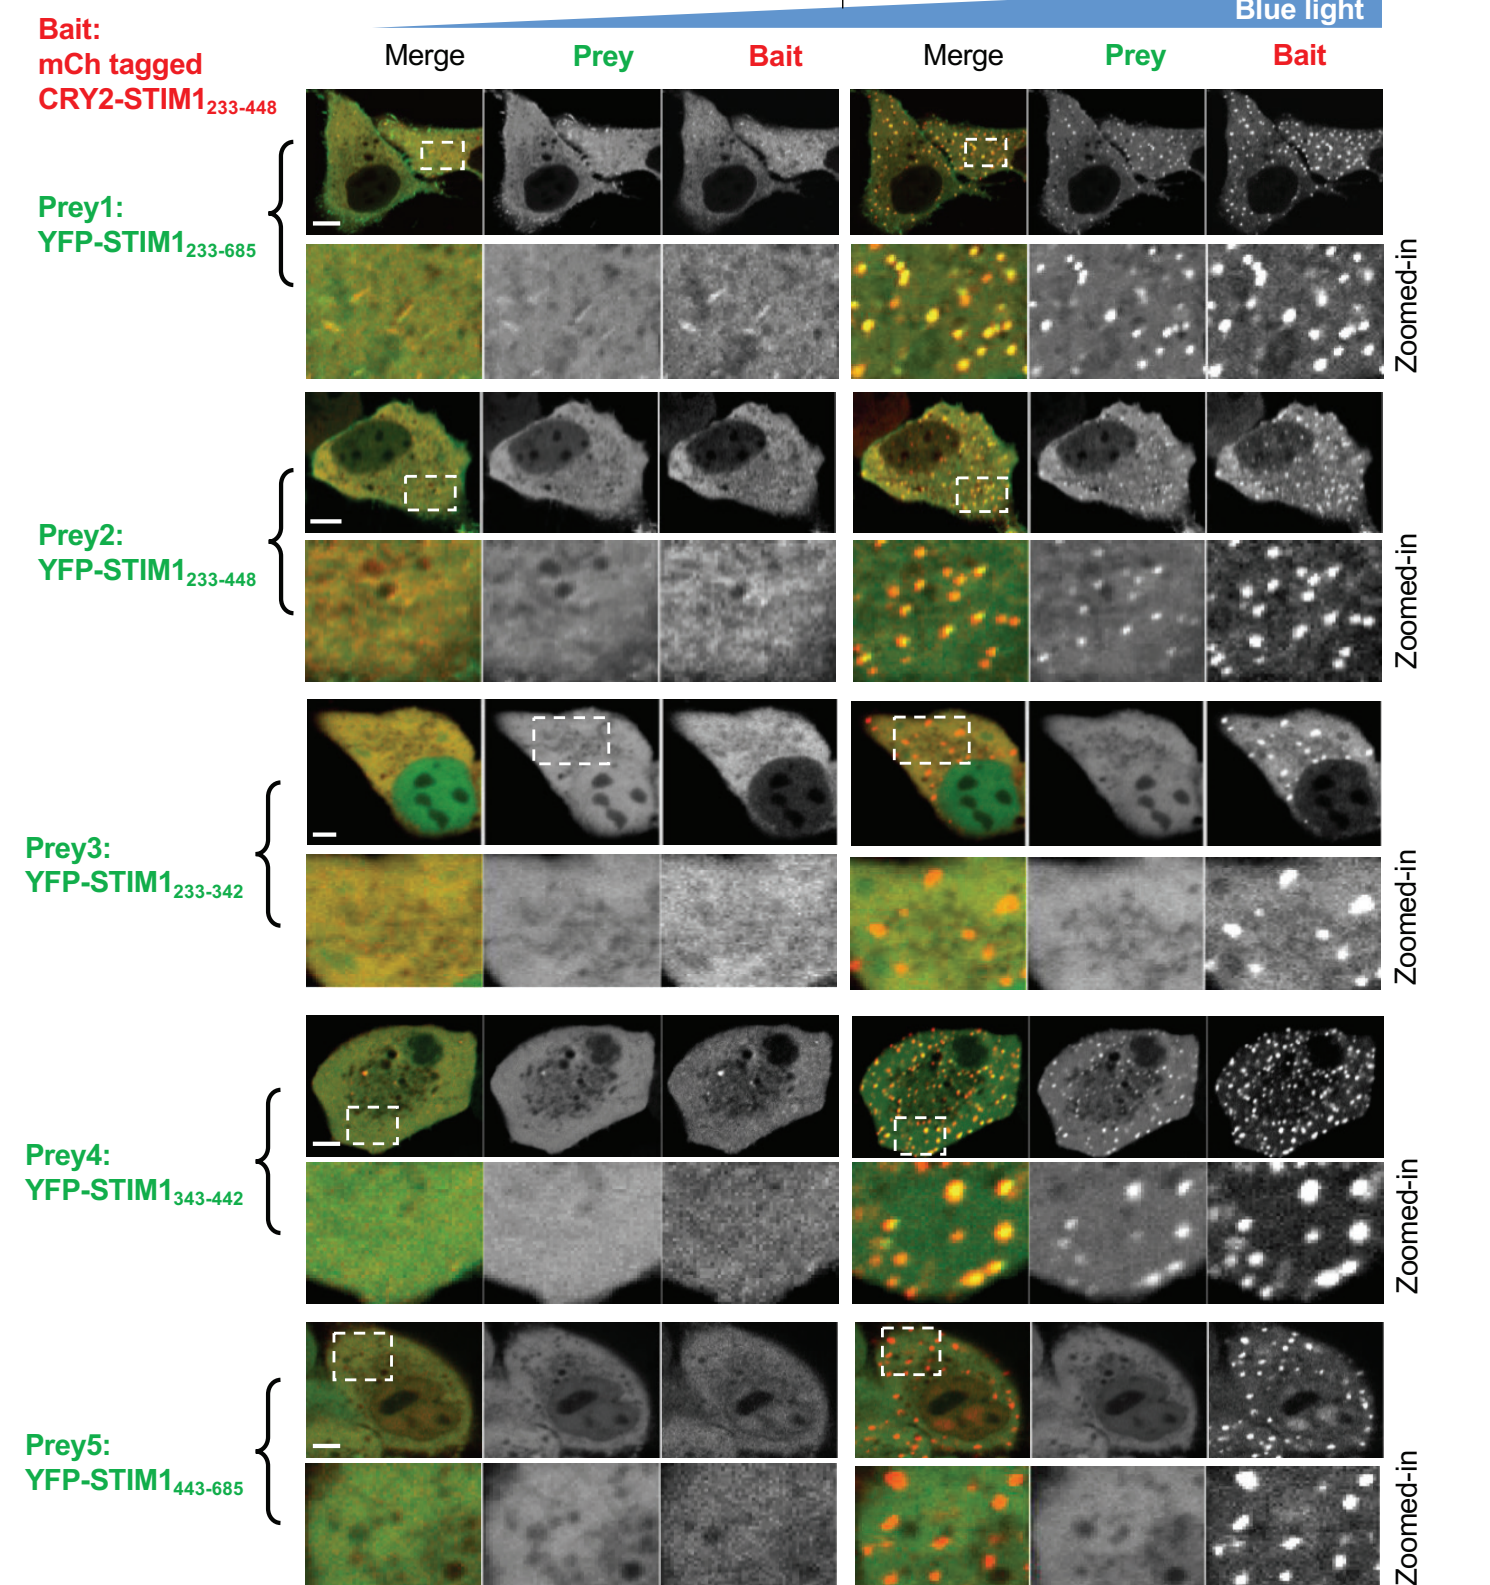

d

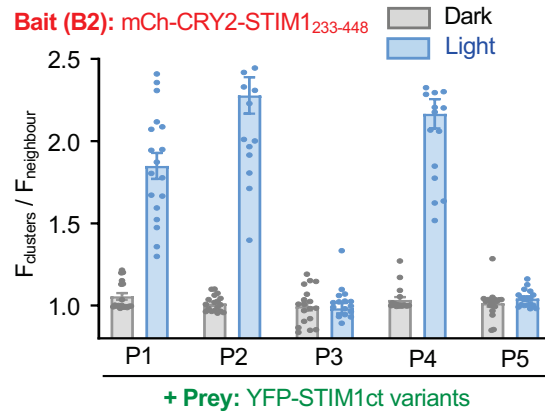

**Supplementary Figure 8 | Light inducible co-clustering of mCh-CRY2-STIM1<sub>233-448</sub> (bait) with YFP-STIM1ct fragments (preys).** (Related to Fig. 4)

(a-b) Schematic of CRY2 fused bait protein co-clustering with prey proteins (a) and the bait-prey combinations used in the assay (b).

(c) Representative confocal images of HeLa cells expressing the bait, mCherry-CRY2-STIM1<sub>233-448</sub>, and the indicated YFP-fused preys upon blue light illumination for 30 sec (left) or 300 sec (right). The selected regions (dashed rectangle) were enlarged for better visualization of the bait-prey colocalization. YFP-STIM1<sub>233-685</sub> (Prey 1), YFP-STIM1<sub>233-448</sub> (Prey 2) and YFP-STIM1<sub>343-442</sub> (Prey 4) displayed light-inducible co-clustering with the bait (STIM1<sub>233-448</sub>). Scale bar, 5  $\mu\text{m}$ .

(d) Quantification of the degrees of light-inducible co-clustering for the five indicated preys in HeLa cells co-transfected with the bait. n = 18 cells from three independent experiments. (Also shown in Figure 4e)

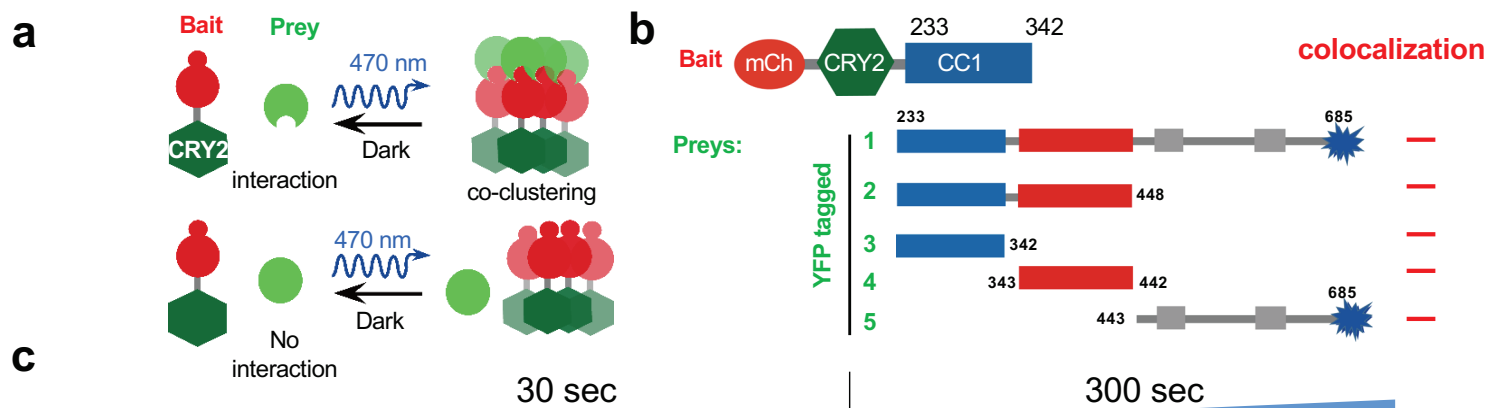

**Bait:**  
mCh tagged  
CRY2-STIM1<sub>233-342</sub>

**Prey1:**  
YFP-STIM1<sub>233-685</sub>

**Prey2:**  
YFP-STIM1<sub>233-448</sub>

**Prey3:**  
YFP-STIM1<sub>233-342</sub>

**Prey4:**  
YFP-STIM1<sub>343-442</sub>

**Prey5:**  
YFP-STIM1<sub>443-685</sub>

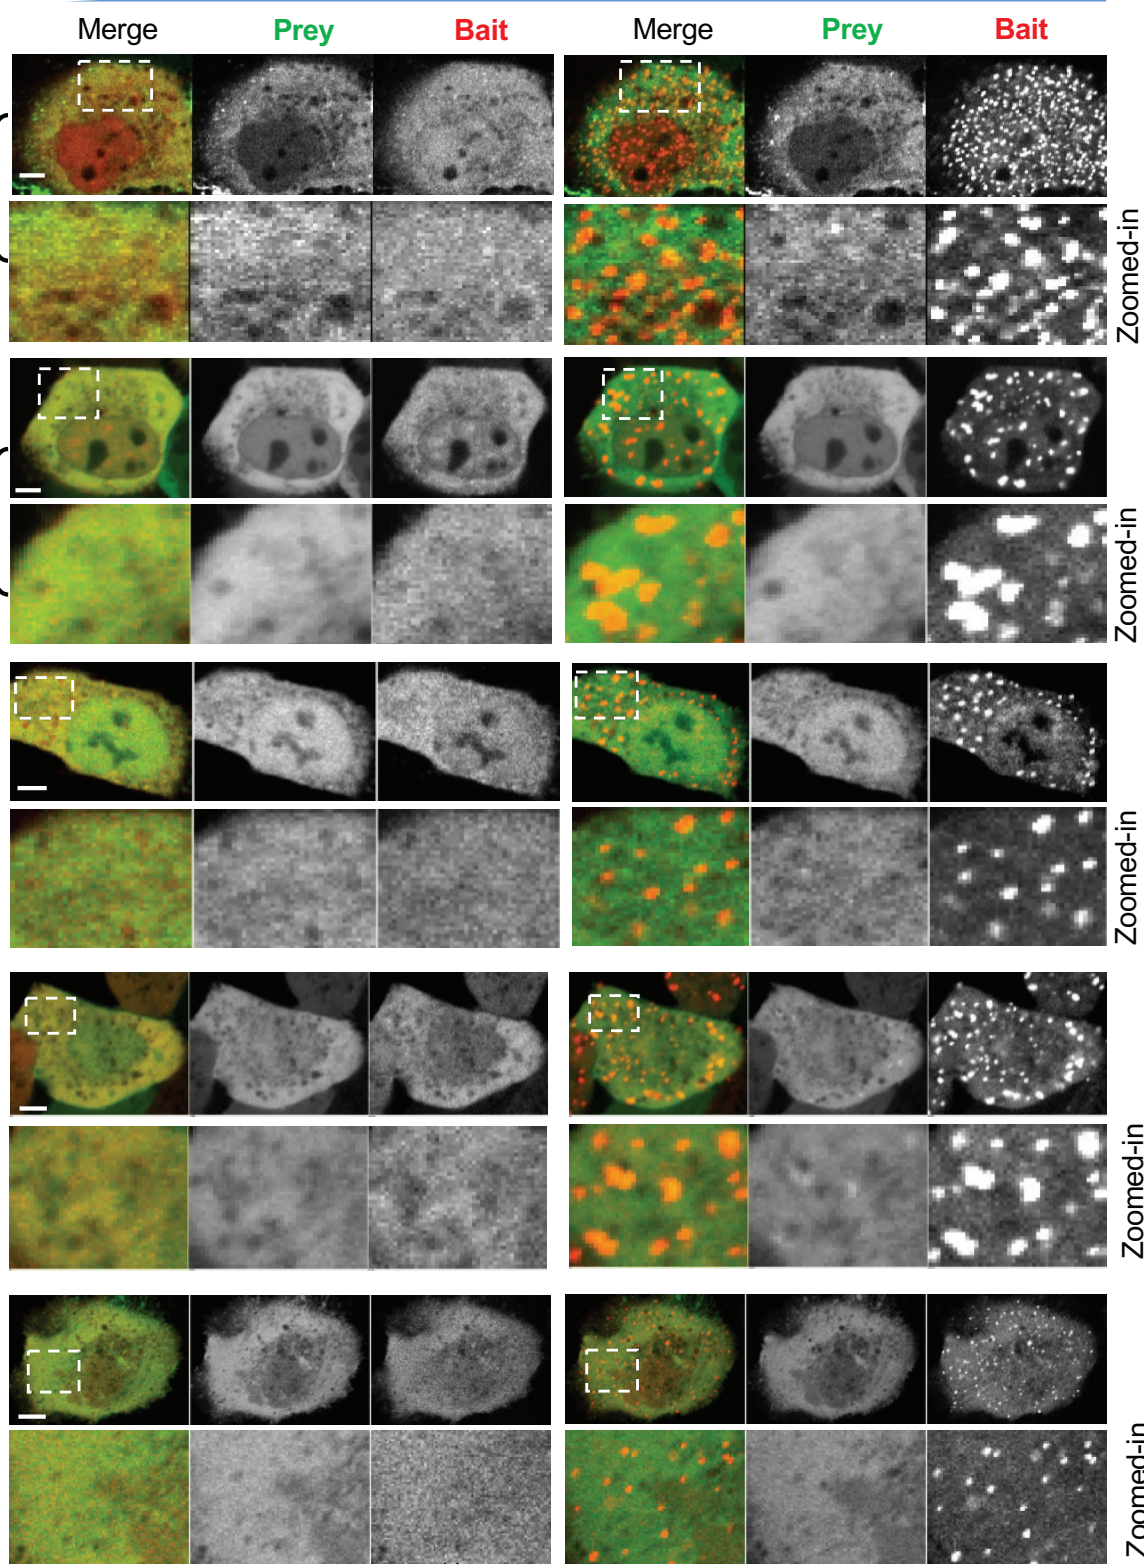

**d**

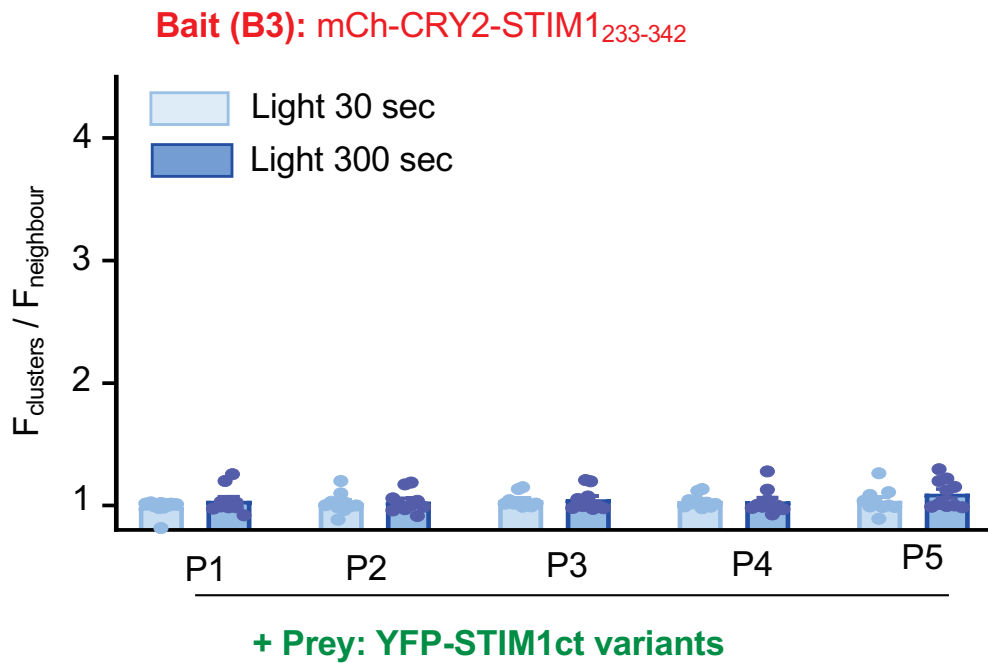

**Supplementary Figure 9 | Light inducible co-clustering of mCh-CRY2-STIM1<sub>233-342</sub> (bait) with the indicated YFP-STIM1ct fragments (preys).** (Related to Fig. 4) Error bars denote sem.

(a-b) Schematic of the design (a) and the bait-prey combinations (b) used in the co-clustering assay.

(c) Representative confocal images of HeLa cells expressing the bait, mCherry-CRY2-STIM1<sub>233-342</sub> and the indicated YFP-tagged preys under blue light illumination. All the preys did not show co-clustering with the bait after photo-illumination at 470 nm. Scale bar, 5  $\mu\text{m}$ .

(d) Quantification of the degrees of light-inducible co-clustering for the indicated preys. n = 10 cells.

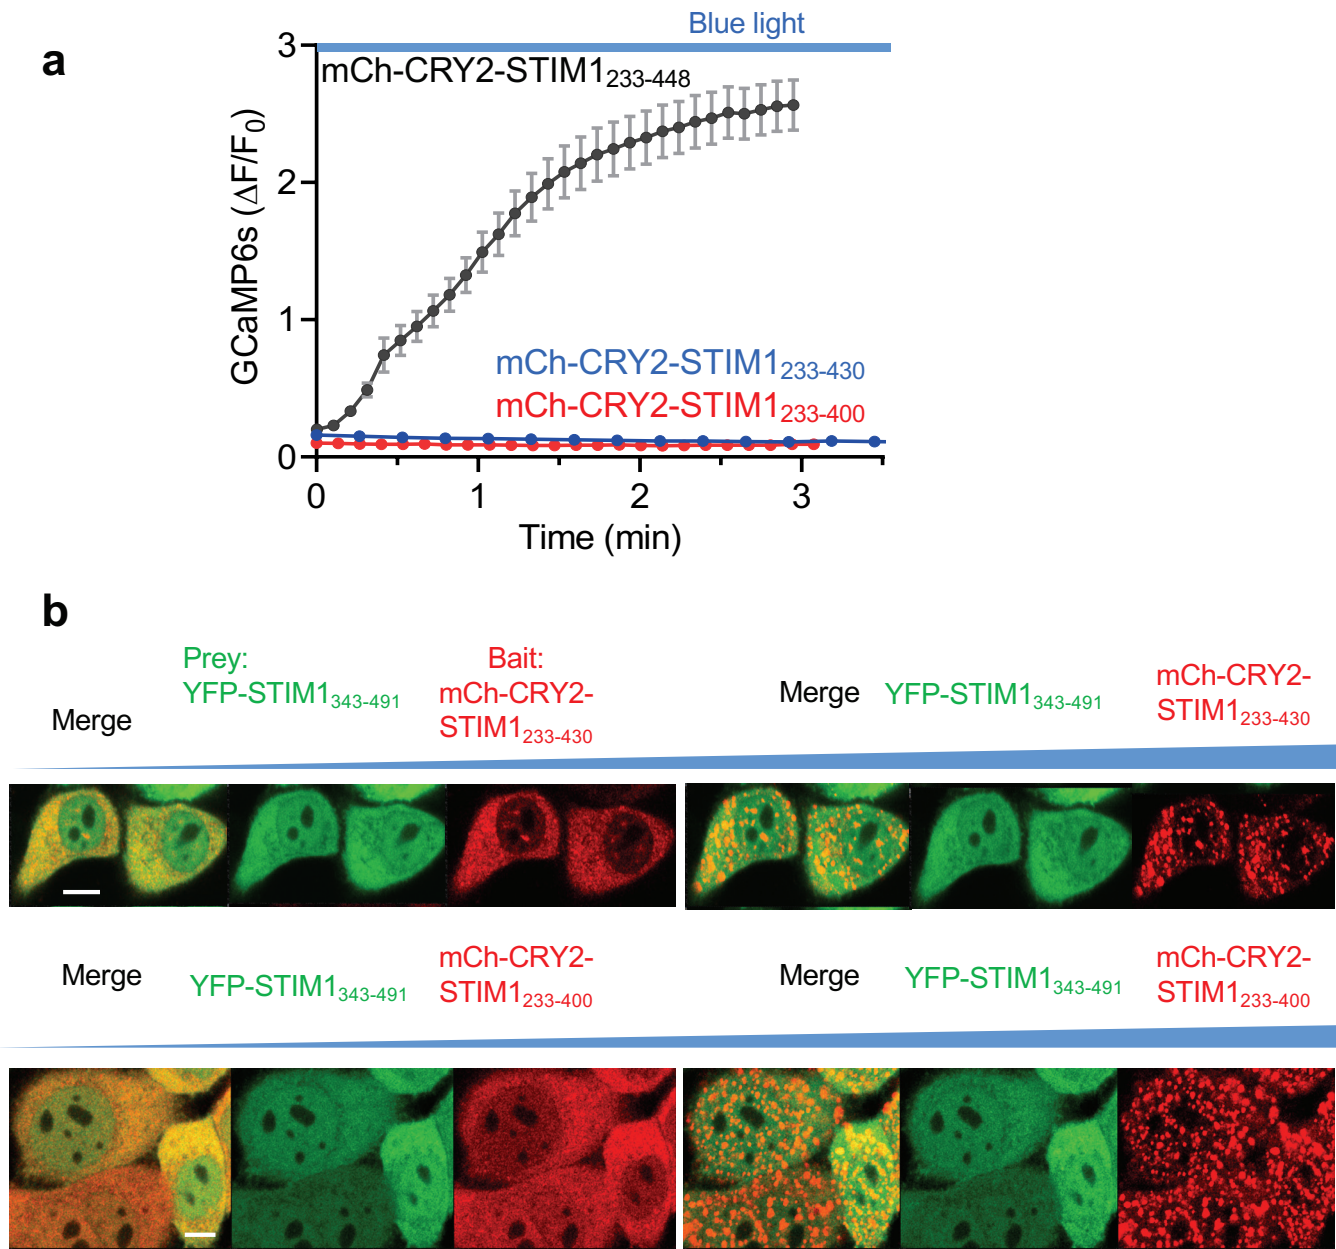

**Supplementary Figure 10 | Truncation of the SOAR domain abolished Ca<sup>2+</sup> influx and STIM1 oligomerization.** (Related to Figs. 1-4)

(a) Time courses of blue light-triggered Ca<sup>2+</sup> entry in HeLa-GCaMP6s cells co-transfected with mCh-CRY2-STIM1<sub>233-448</sub>, mCh-CRY2-STIM1<sub>233-430</sub> or mCh-CRY2-STIM1<sub>233-400</sub>. n = 30 cells. Error bars denote sem.

(b) Representative confocal images of HeLa cells expressing YFP-STIM1<sub>343-491</sub> (within intact SOAR) and SOAR-truncated variants, mCh-CRY2-STIM1<sub>233-430</sub> (*up*) or mCh-CRY2-STIM1<sub>233-400</sub> (*bottom*) after blue light illumination for 30 sec (left) or 300 sec (right). Scale bar 5  $\mu$ m.

**NOTE:** We failed to detect the light-induced co-clustering between the baits and the prey, implying that the structural integrity of SOAR is required for STIM1 oligomerization.



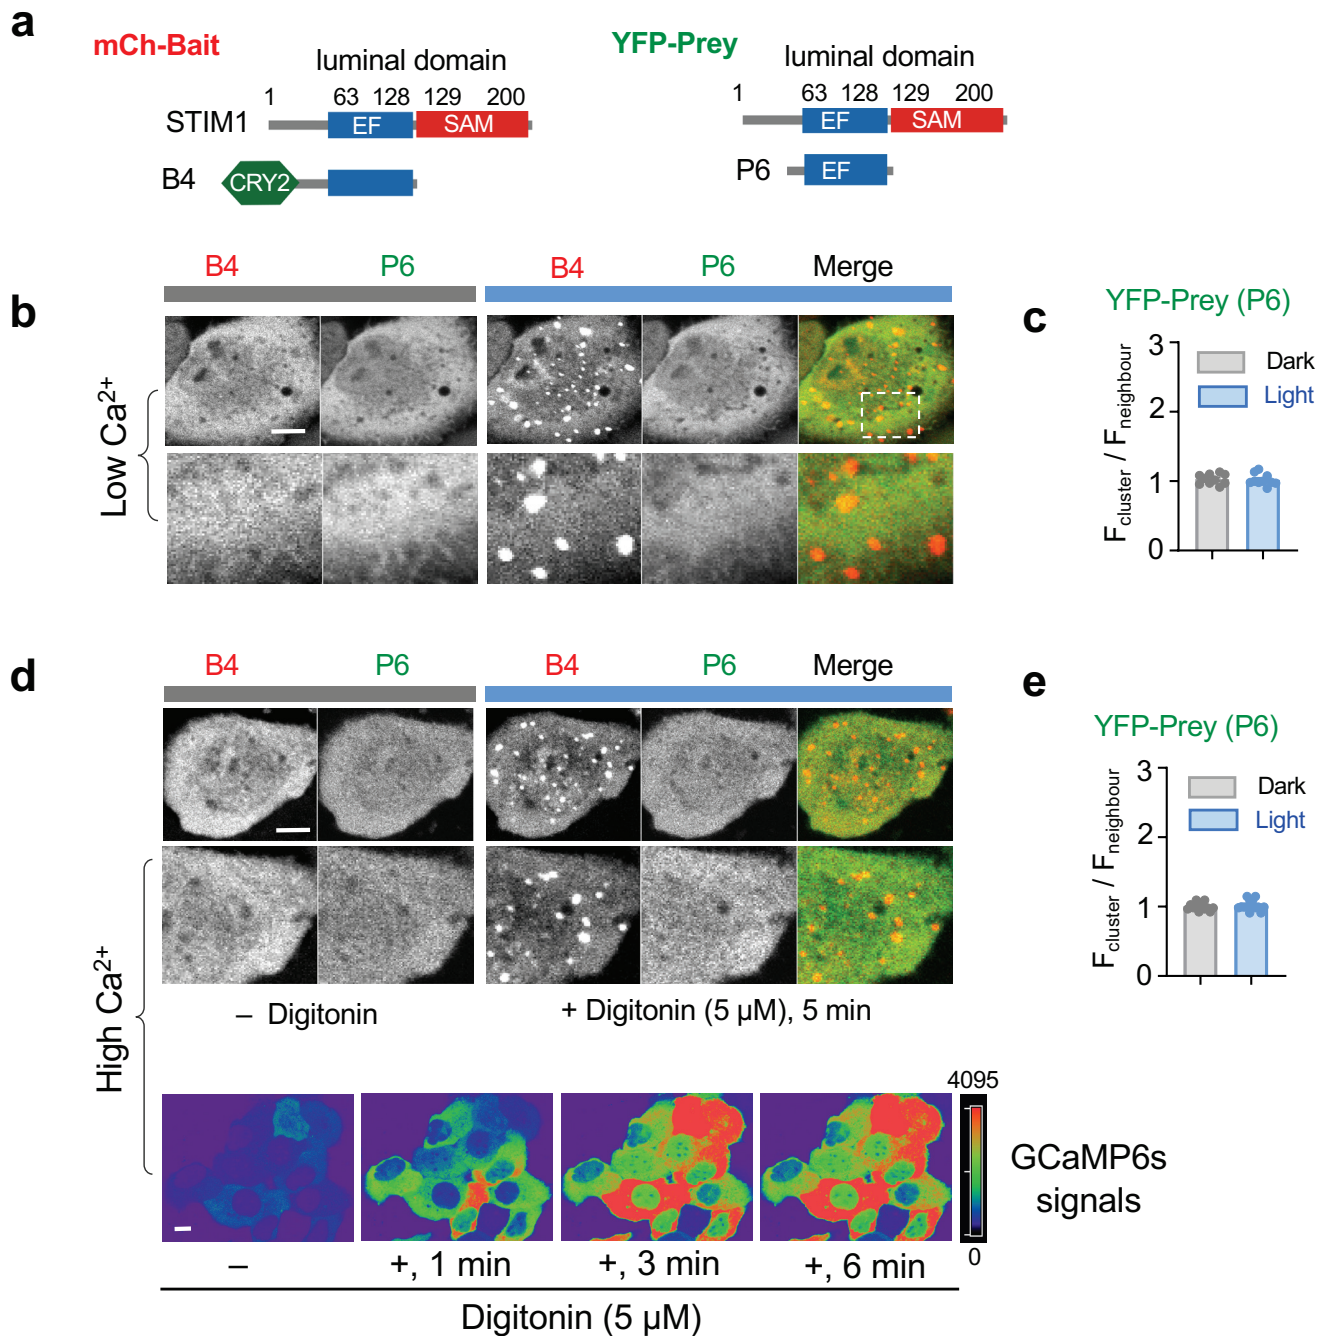

**Supplementary Figure 11 | Evaluating the effect of  $\text{Ca}^{2+}$  on STIM1 EF-hand/EF-hand interactions.** (Related to **Fig. 4**) Scale bar, 5  $\mu\text{m}$ . Error bars denote sem.

(a) Schematic of the bait-prey combination.

(b-c) Representative confocal images of HeLa cells expressing the bait, mCherry-CRY2-EF (B4, STIM1<sub>32-128</sub>) and YFP-tagged EF-hand (YFP-EF; P6) before and after blue light illumination. Note that panel b was also shown in **Fig. 4h**. YFP-EF did not show co-clustering with the bait after photo-illumination. The clustering of P6 was measured by the ratio of  $F_{\text{cluster}}/F_{\text{neighbor}}$  in panel c.  $n = 10$  cells.

(d-e) Representative confocal images of HeLa cells expressing B4 and P6 following treatment with 5  $\mu\text{M}$  digitonin to allow extracellular  $\text{Ca}^{2+}$  influx (1.8 mM). (d) The bottom images showed  $\text{Ca}^{2+}$  entry after treatment of 5  $\mu\text{M}$  digitonin and cells remained intact within the first 6 min. The top images showed that YFP-EF did not co-cluster with the baits after blue light illumination even in the presence of digitonin (with subsequent high  $\text{Ca}^{2+}$  loading into the cytosol). (e) Quantification of the clustering degrees of the prey.  $n = 10$  cells.

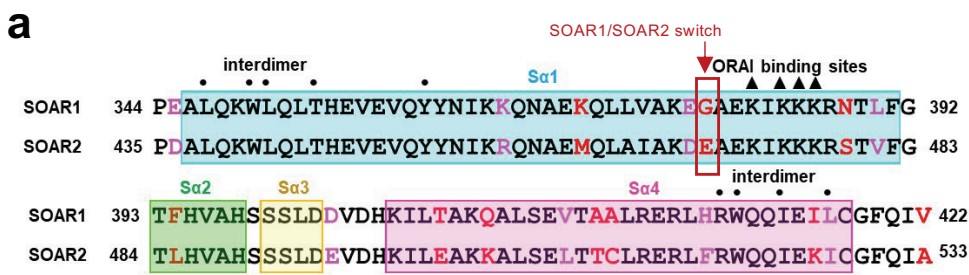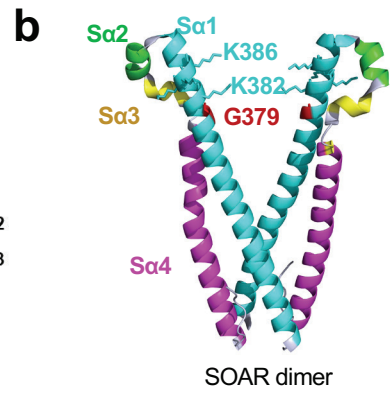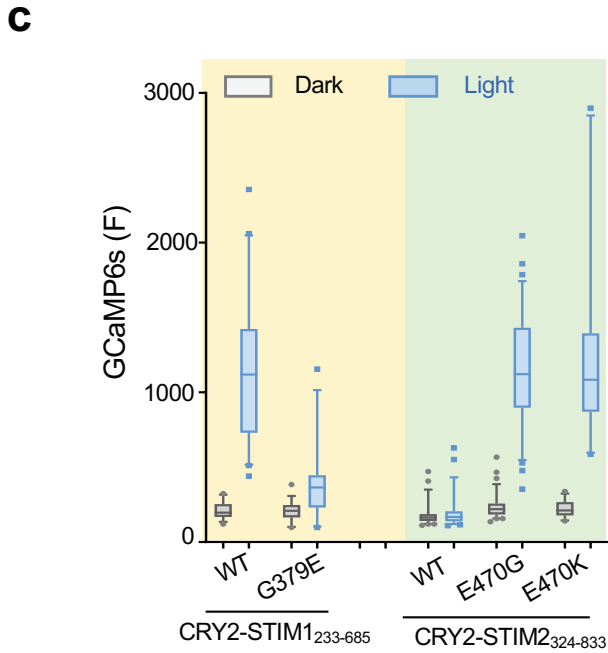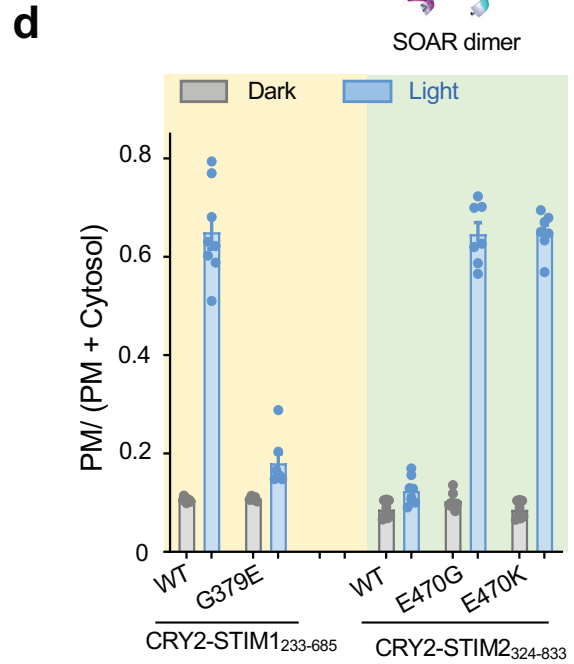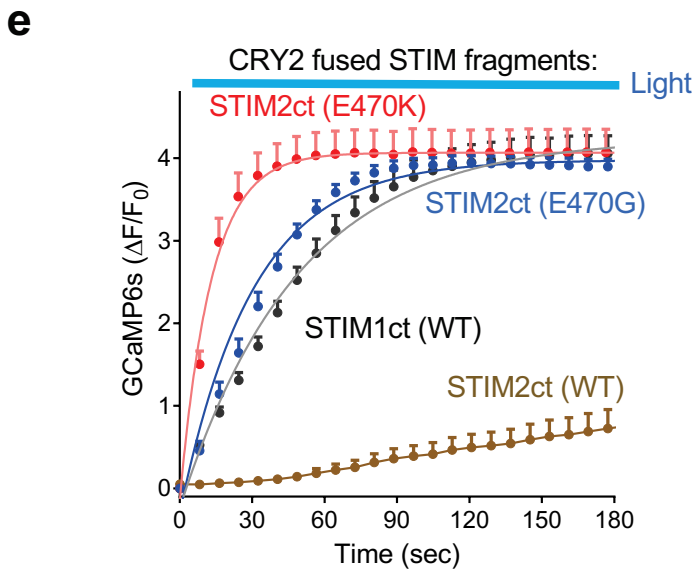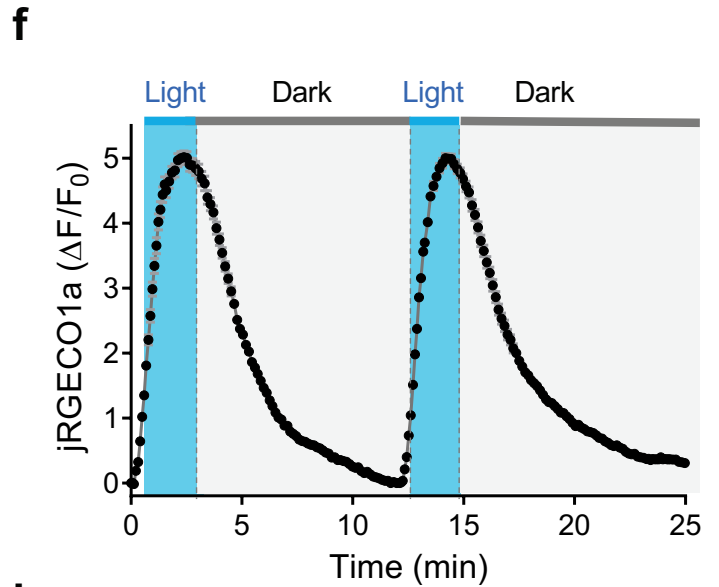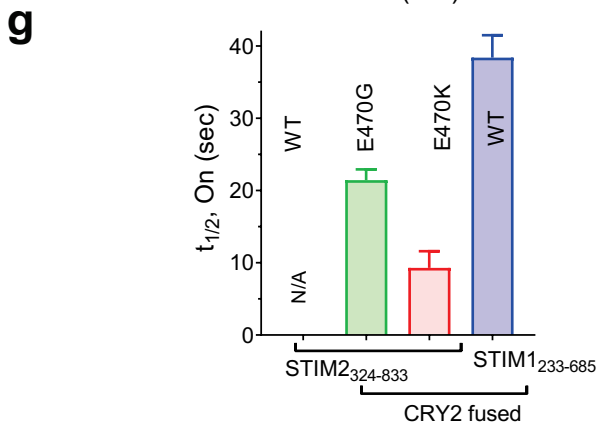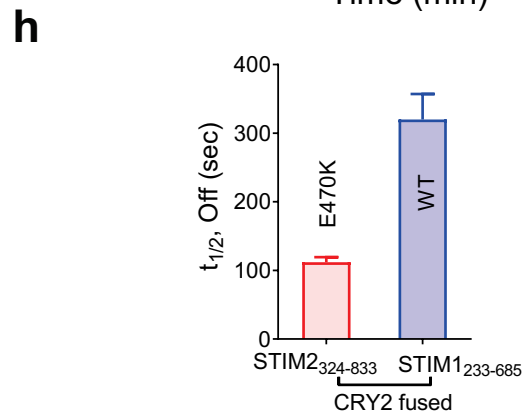

**Supplementary Figure 12 | An optogenetic approach to dissect the molecular determinants in STIM1 and STIM2 that account for differential ORAI activation.** Data were shown as mean  $\pm$  sem. (Related to Fig. 5)

- (a) Sequence alignments of the SOAR domains derived from STIM1 (SOAR1) and STIM2 (SOAR2).
- (b) The 3D structure of SOAR1 highlighting the key residue (PDB entry: 3TEQ, G379 in STIM1; the equivalent of E470 in STIM2) responsible for the differential ORAI-activating capabilities of STIM proteins.
- (c-d) Quantification of light induced  $\text{Ca}^{2+}$  influx (c) and the cytosol-to-PM translocation (d) of CRY2 fused STIM1ct (STIM1<sub>233-685</sub>) or STIM2ct (STIM2<sub>324-833</sub>). n = 60 cells for  $\text{Ca}^{2+}$  influx from three independent experiments. n = 10 cells for PM translocation.
- (e) Time courses of blue light-triggered  $\text{Ca}^{2+}$  entry in HeLa-GCaMP6s cells co-transfected with mCh-CRY2-STIMct variants and CFP-ORA1. n = 60 cells from three independent experiments.
- (f) Reversible  $\text{Ca}^{2+}$  response in HeLa cells co-expressing CRY2-STIM2ct (E470K) and the red  $\text{Ca}^{2+}$  sensor jRGECO1a upon exposure to repeated light-dark cycles (2 min ON + 12 min OFF). Blue bar, light stimulation at 470 nm with a power density of 4 mW/cm<sup>2</sup>. n = 24 cells.
- (g-h) Comparison of the activation (g) and deactivation half-lives (h) of CRY2-STIM1ct (aa 233-685) and CRY2-STIM2ct-E470K or E470G (aa 324-833). n = 24 cells.

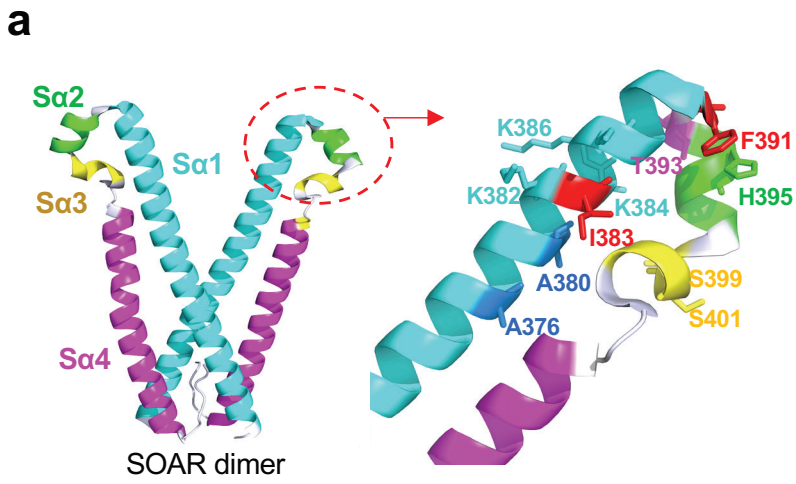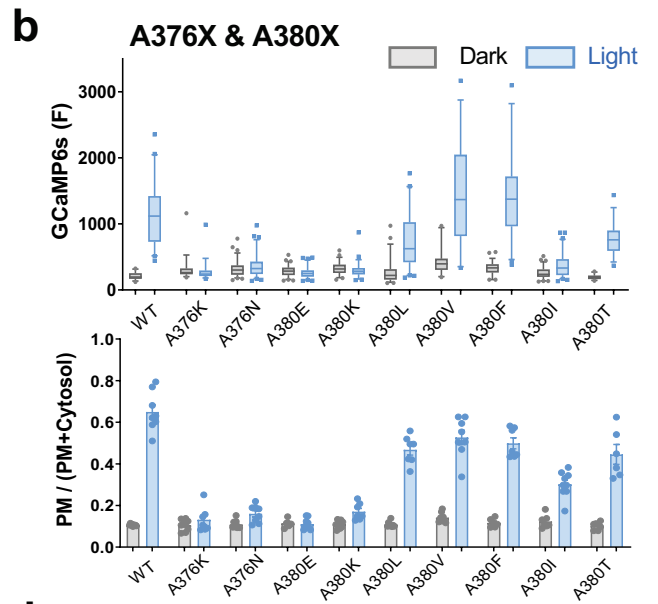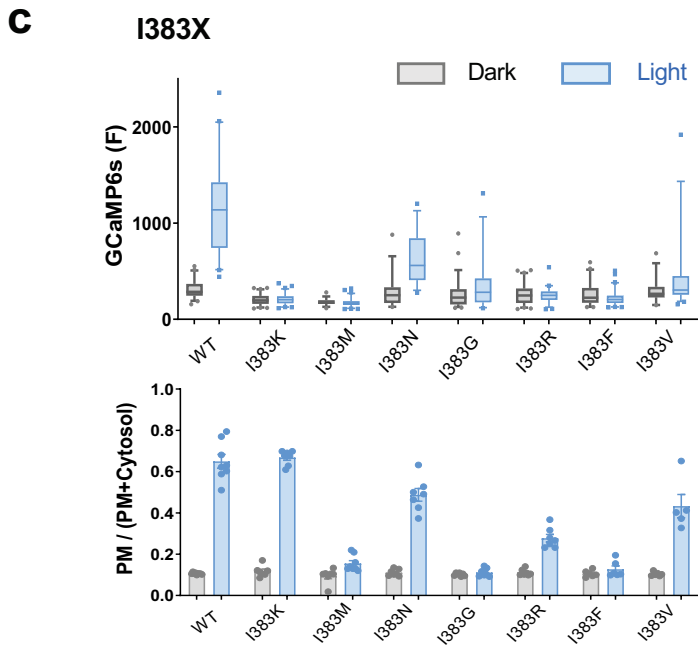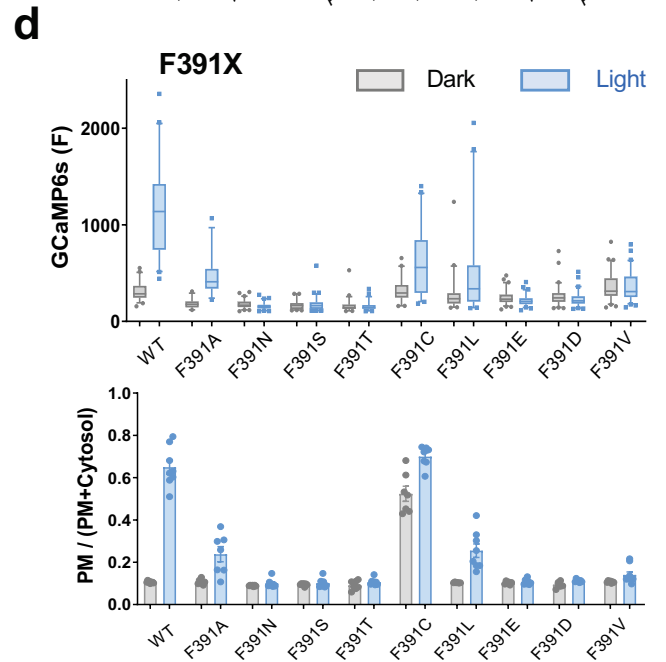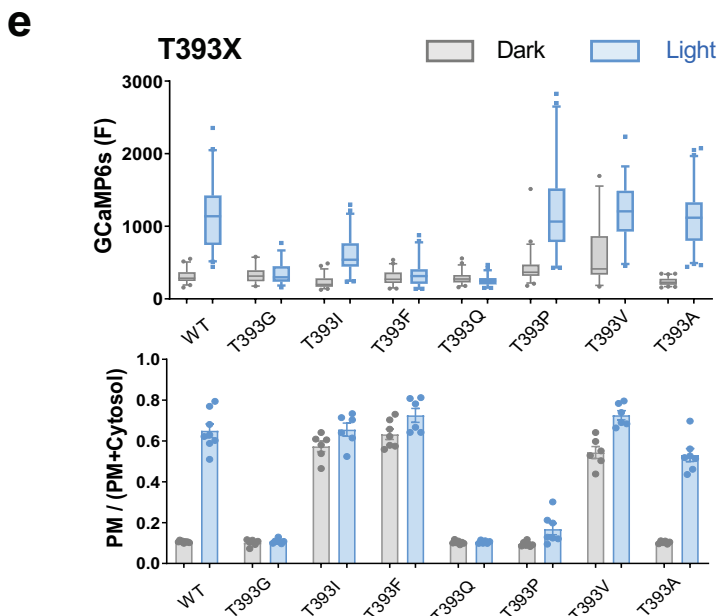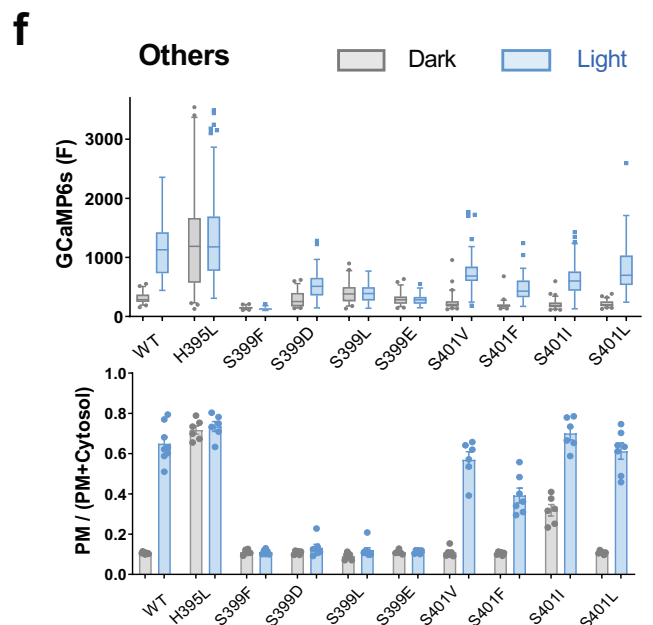

**Supplementary Figure 13 | Optogenetic screening of SOAR mutations that decouple ORAI binding from ORAI channel gating.** (related to Fig. 5)

(a) Mutations in STIM1 were mapped to the 3D structure of SOAR.

(b-f) Summary of the screening results. The HeLa-GCaMP6s stable cells were co-transfected with mCh-tagged STIM1ct mutants and CFP-ORAI1. Box-whisker plots showing the quantification of light induced  $\text{Ca}^{2+}$  influx (top) and cytosol-to-PM translocation (bottom), as well as photo-induced PM translocation, for CRY2 fused STIM1ct variants. Box-whisker plots are expressed as median, interquartile range with 5-95 percentile distribution. GCaMP6s was used to report the basal level of  $\text{Ca}^{2+}$  (grey) and light induced  $\text{Ca}^{2+}$  influx (blue) in HeLa cells. The I383K mutant showed light-inducible PM translocation without  $\text{Ca}^{2+}$  influx (panel c). The T393F mutant exhibited constitutive localization at PM without eliciting significant changes in  $\text{Ca}^{2+}$  influx upon photoactivation (panel e). Some data were also used in the scatter plot shown in Fig. 5c. n = 60 cells from three independent experiments for  $\text{Ca}^{2+}$  signals. n = 10 for cytosol-to-PM translocation. Error bars denote sem.

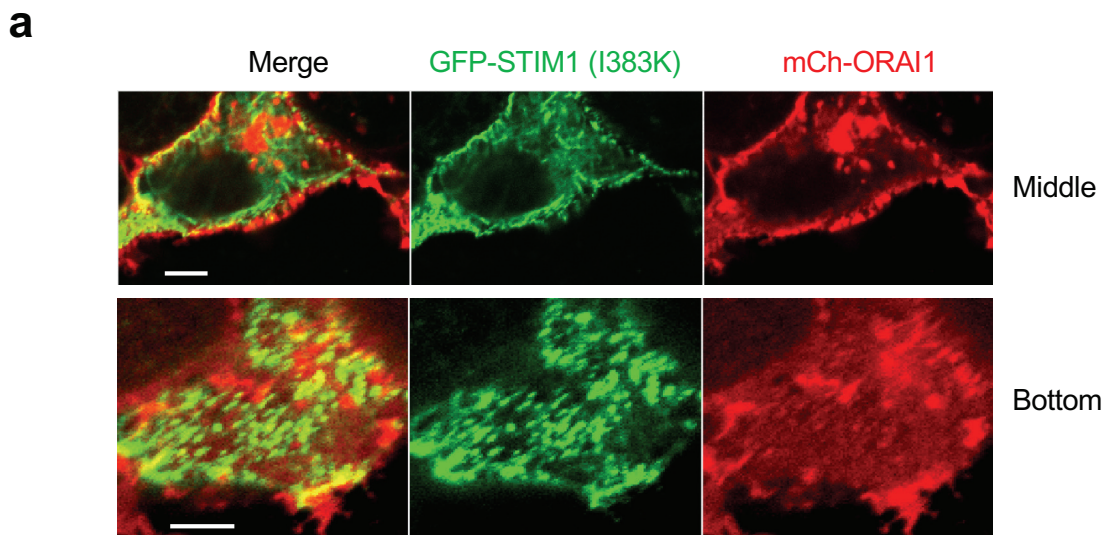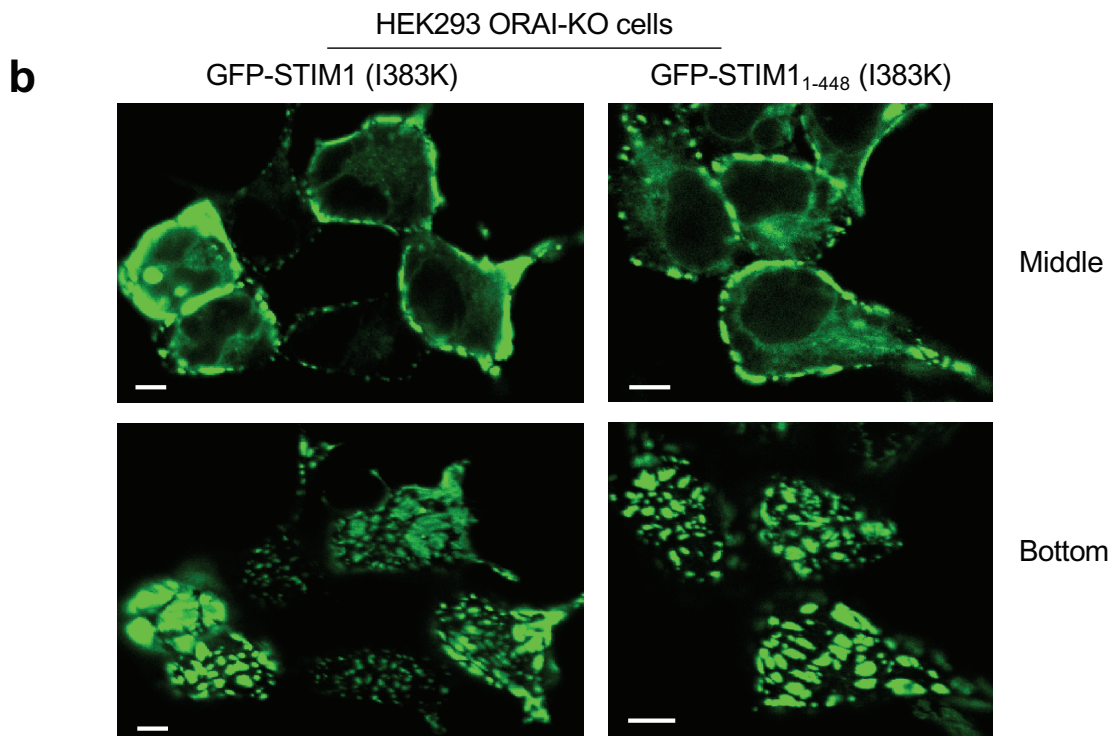

**Supplementary Figure 14 | I383K caused constitutive formation of STIM1 puncta at ER-PM junctions.** (related to Fig. 5) Scale bar 5  $\mu$ m.

(a) Representative confocal images (top: the middle plane; bottom: the bottom layer) of HeLa cells co-expressing GFP-STIM1-I383K and mCh-ORAI1 at the resting condition. The footprint view of the image indicated very little colocalization between GFP-STIM1 and mCh-ORAI1.

(b) Representative middle (*top*) and footprint (*bottom*) views of confocal images of ORAI-deficient HeLa cells expressing GFP-STIM1-I383K and GFP-STIM1<sub>1-448</sub>-I383K, the latter of which lacks the phosphoinositide (PIP)-binding polybasic tail in the C-terminus. We speculate that the I-to-K substitution generates a new PIP-binding motif to enable the spontaneous translocation of STIM1 toward PM even in the absence of ORAI1 or STIM1-PB.

# a SOAR mutations present in patients

| Mutations | Cancer genomics <sup>1</sup>      |                                                             | Other diseases                                                                 | Optogenetic dissection |
|-----------|-----------------------------------|-------------------------------------------------------------|--------------------------------------------------------------------------------|------------------------|
|           | Sample ID                         | Cancer type                                                 |                                                                                |                        |
| W350L     | TCGA-35-4123-01                   | Lung Adenocarcinoma                                         |                                                                                |                        |
| E378F     | TCGA-F1-A448-01                   | Stomach Adenocarcinoma<br>Mucinous Stomach Adenocarcinoma   |                                                                                |                        |
| E378S     | TCGA-F1-A448-01                   | Stomach Adenocarcinoma<br>Mucinous Stomach Adenocarcinoma   |                                                                                |                        |
| A380T     | Pat_41_Post                       | Melanoma                                                    |                                                                                |                        |
| K382N     | TCGA-19-5956-01                   | Glioblastoma Multiforme                                     |                                                                                |                        |
| K384Q     | 587376                            | Colorectal Adenocarcinoma                                   |                                                                                |                        |
| H395Y     | TCGA-44-2656-01                   | Lung Adenocarcinoma                                         |                                                                                | Gain of function       |
| V396M     | TCGA-AX-A0J1-01                   | Uterine Endometrioid Carcinoma                              |                                                                                |                        |
| L402R     | TCGA-DW-7963-01                   | Papillary Renal Cell Carcinoma                              |                                                                                |                        |
| K408T     | 587376                            | Colorectal Adenocarcinoma                                   |                                                                                |                        |
| K408Q     | TCGA-D3-A2JF-06                   | Cutaneous Melanoma                                          |                                                                                |                        |
| R424W     | TCGA-BR-4368-01                   | Stomach Adenocarcinoma                                      |                                                                                | Gain of function       |
| R426L     | H072969                           | Hepatocellular Adenoma                                      |                                                                                | Loss of function       |
| R426C     | MEL-IPI_Pat157-Tumor-SM-7A15B     | Cutaneous Melanoma                                          | Dental enamel maturation defect, Mild immunodeficiency <sup>2</sup>            | Loss of function       |
| R429C     |                                   |                                                             | Muscular hypotonia, partial iris hypoplasia / mydriasis, enuresis <sup>2</sup> | Loss of function       |
| E434K     | TCGA-AN-A046-01, TCGA-IB-7651-01, | Breast Invasive Ductal Carcinoma, Pancreatic Adenocarcinoma |                                                                                |                        |

1. The cancer genomics data is from cBioPortal: [http://www.cbioportal.org/results/mutations?session\\_id=5b9ab9a3498eb8b3d567d6c1](http://www.cbioportal.org/results/mutations?session_id=5b9ab9a3498eb8b3d567d6c1)

2. Lacruz RS, Feske S. Diseases caused by mutations in ORAI1 and STIM1. Ann N Y Acad Sci. 2015 Nov;1356:45-79

## b

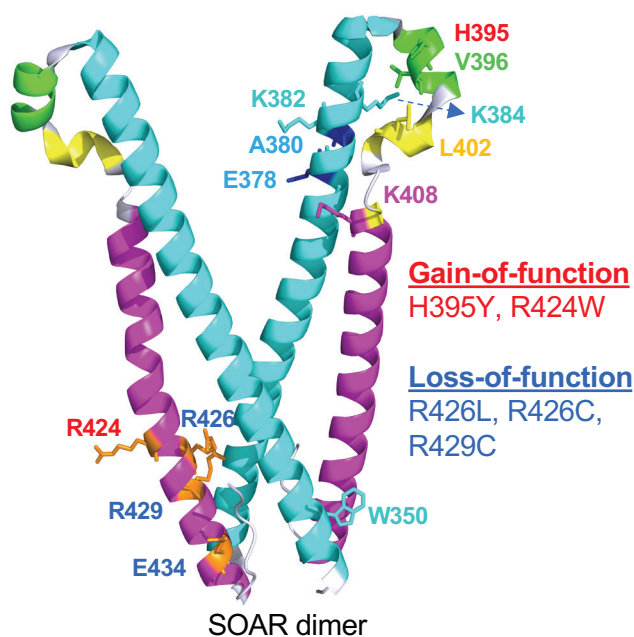

## c

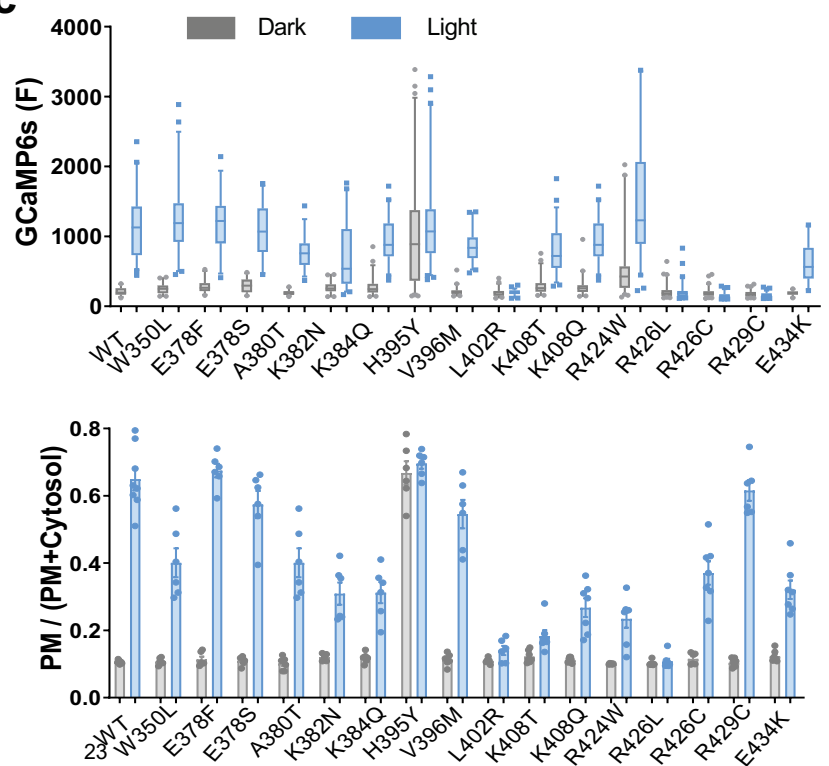

**Supplementary Figure 15 | Optogenetic dissection of cancer-associated mutations in the SOAR domain.**  
(related to Fig. 5)

(a) A summary of SOAR mutations found in cancer patients.

(b) Some cancer-associated mutations of STIM1 were mapped to the 3D structure of SOAR. Gain- and loss-of-function mutations validated in this study were highlighted in red and blue, respectively.

(c) Quantification of light induced  $\text{Ca}^{2+}$  influx (top) and cytosol-to-PM translocation (bottom) for CRY2 fused STIM1ct variants.  $\text{Ca}^{2+}$  influx were shown in Box-whisker plots, which are expressed as median, interquartile range with 5-95 percentile distribution (n = 60 cells). Cytosol-to-PM translocation were plotted as scatter plot (n = 10 cells). Error bars, sem.



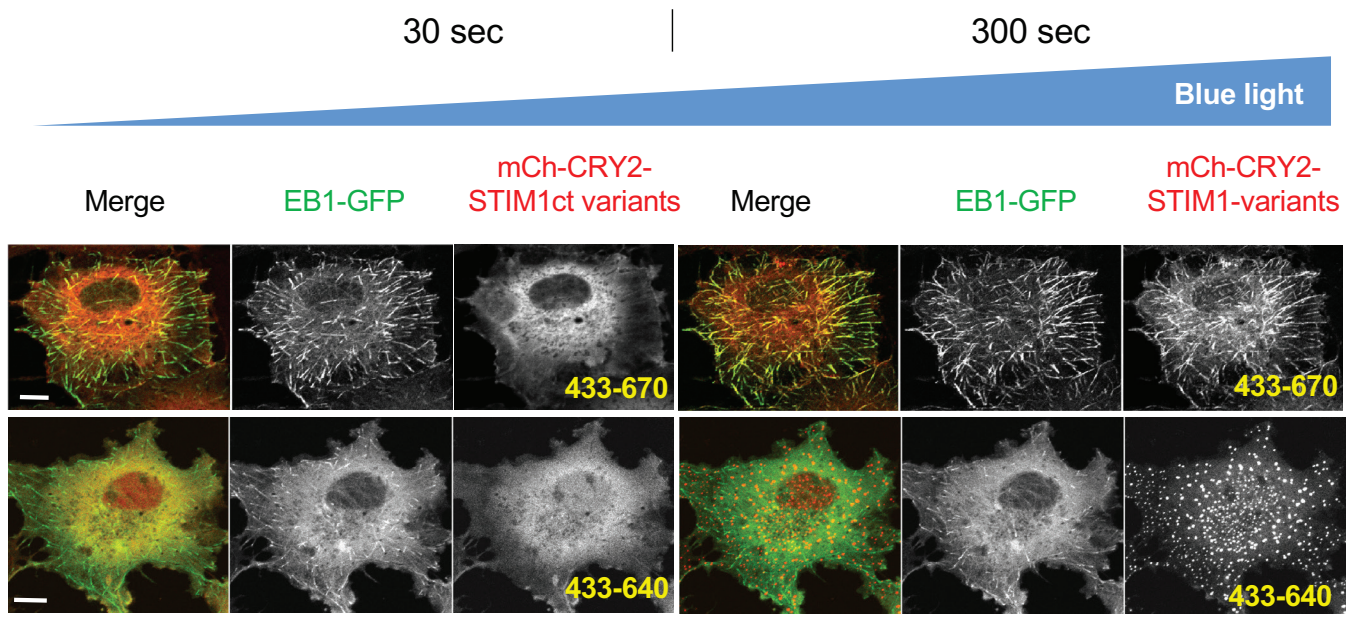

**Supplementary Figure 16 | CRY2-based optogenetic tools to characterize the EB1 binding domain of STIM1.** (Related to Fig. 6)

The representative confocal images showing light inducible +TIPs tracking in COS-7 cells co-expressing EB1-GFP (green) and mCh-CRY2-STIM1ct fragments (red). CRY2 fused STIM1<sub>433-670</sub> displayed strong +TIP tracking with long “comets” formation. However, CRY2 fused STIM1<sub>433-640</sub>, lacking the S/TxIP motif, failed to track the MT tips and tended to self-aggregate. Scale bar, 5  $\mu$ m.

**a**

|                       |  |                  |      |                     |
|-----------------------|--|------------------|------|---------------------|
| STIM1-PB<br>(671-685) |  | -RKKFPLKIFKKPLKK | +    | WT                  |
|                       |  | -----A-          | -    | K684A               |
|                       |  | -----K--         | +++  | P682K               |
|                       |  | -----K--         | +++  | L683K               |
|                       |  | -----KK--        | ++++ | P682K/L683K (PL/KK) |

**b**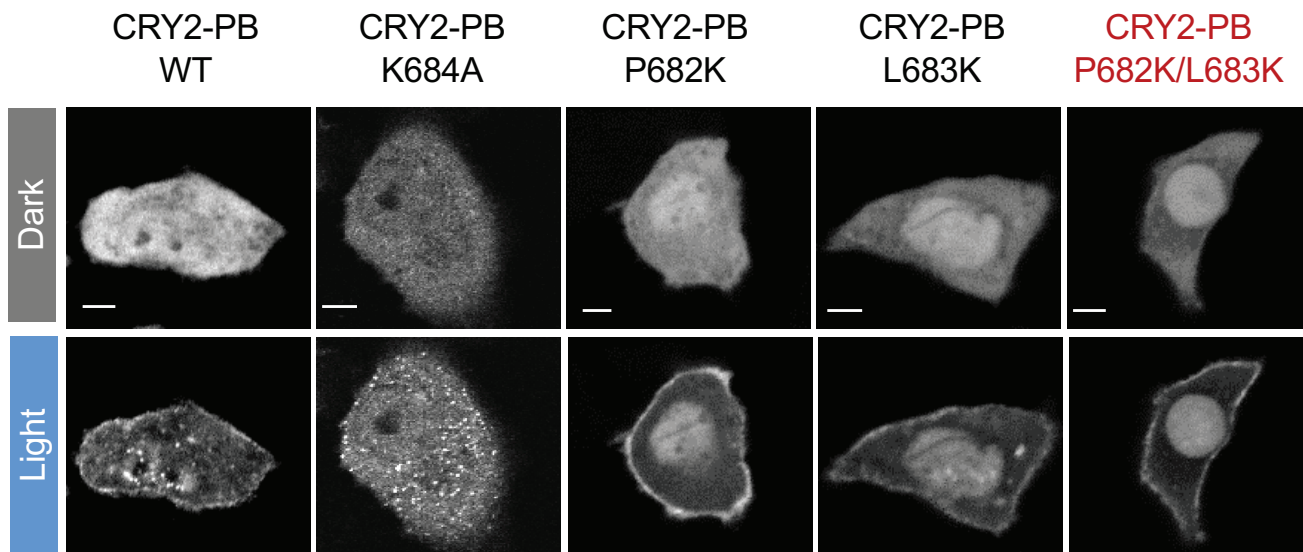**c**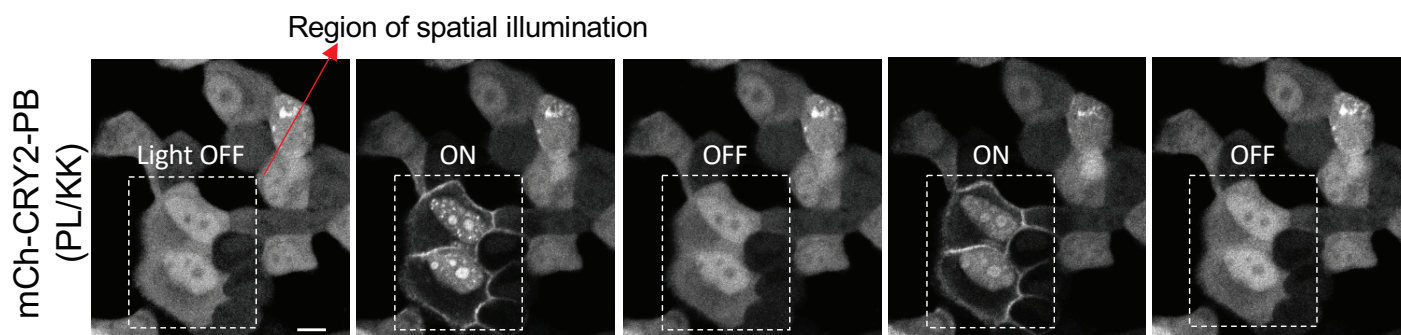**d**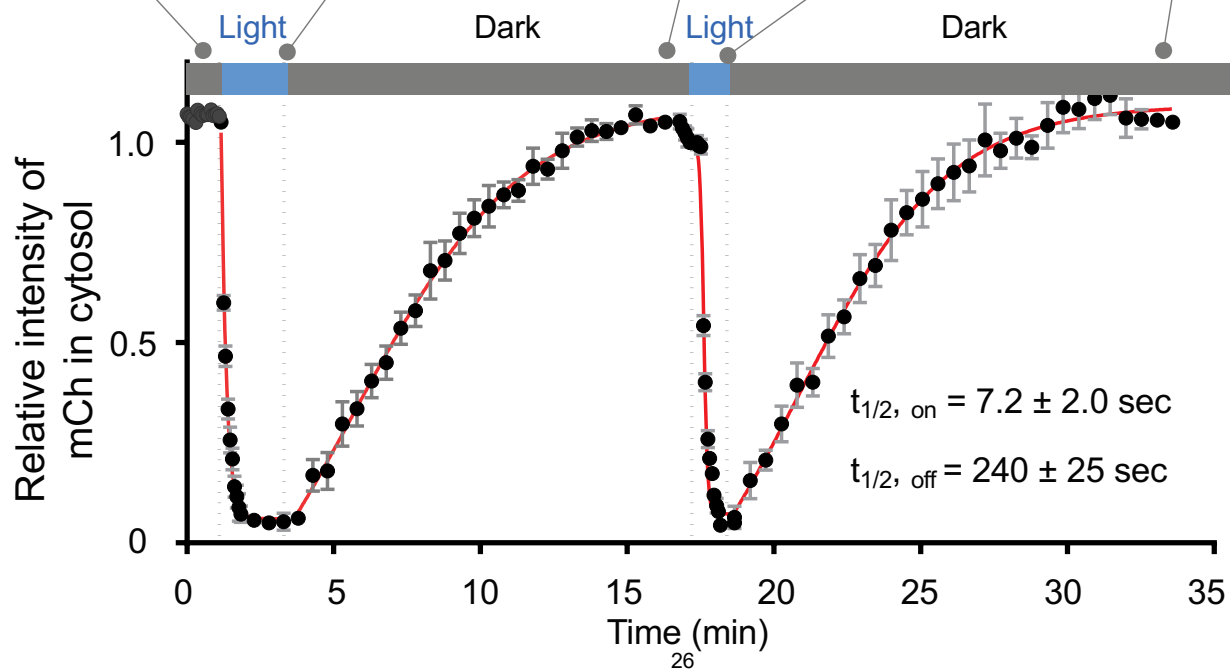

**Supplementary Figure 17 | Optogenetic dissection of the interaction between STI1M-PB and the PM.**  
(Related to **Fig. 6**)

(a) Schematic diagram showing the primary sequence of the polybasic domain (PB) of STIM1 (STIM1-PB; aa 671-685) and mutations introduced to reduce (K>A) or enhance PM-targeting (PL>KK).

(b) Representative confocal images of HeLa cells expressing the indicated mCh-CRY2-PB variants before (gray bar) and after blue light illumination (blue bar). Scale bar, 5  $\mu\text{m}$ . NOTE: Because the PB domain resembles nuclear localization sequences that are rich in positively-charged residues, CRY2-PB variants showed both PM-like and nuclear localization.

(c) Spatial control of PM targeting of mCh-CRY2-PB (PL>KK). HeLa Cells were subjected to patterned blue light exposure within the selected regions. Only the illuminated region exhibited reversible cytosol-to-PM translocation, indicating the high spatial and temporal precision of the tool. Also see **Supplementary Video 5**. Scale bar, 5  $\mu\text{m}$ .

(d) Quantification of cytosolic mCherry signals in HeLa cells expressing mCh-CRY2-PB (PL>KK) when responding to two repeated light-dark cycles. The activation and deactivation half-lives were determined to be:  $t_{1/2, \text{on}} = 7.2 \pm 2.0$  sec and  $t_{1/2, \text{off}} = 240 \pm 25$  sec. Blue bar, light stimulation at 488 nm. n = 7 cells. Error bars denote sem.

**a**

mCh-CRY2-STIM1ct variants:

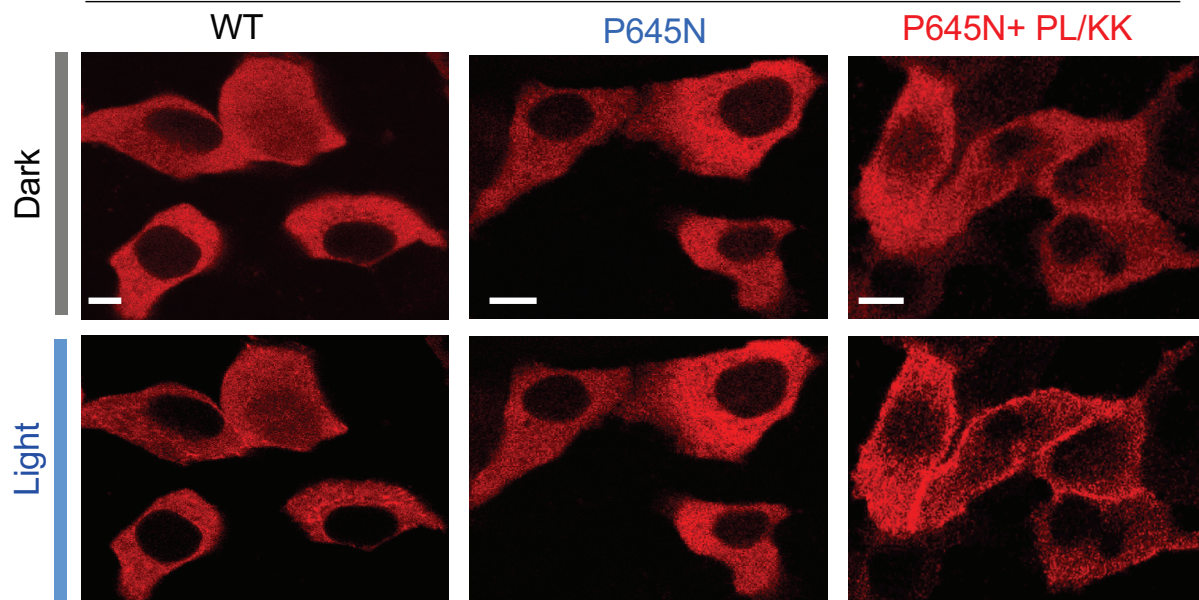**b**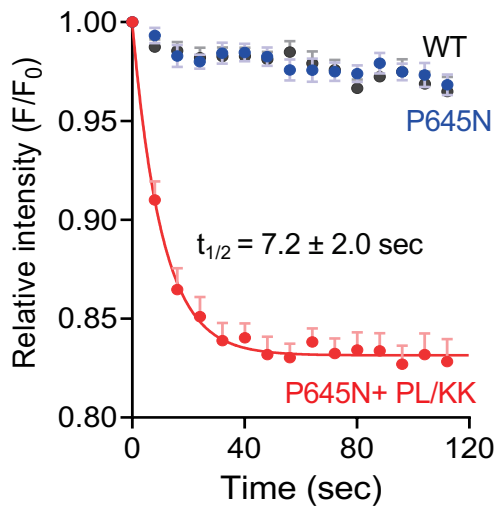**c**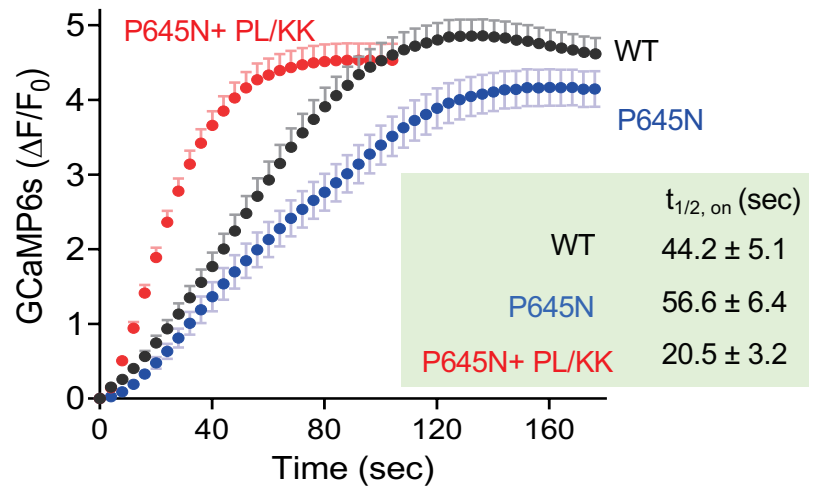

**Supplementary Figure 18 | Characterization of CRY2-STIM1ct variants with mutations in the S/TxIP and PB domains.** (Related to Fig. 6)

(a) Representative confocal images of HeLa cells expressing mCh-CRY2-STIM1ct (WT), P645N and P645N+P682K/L683K (PL/KK) before and after blue light illumination. Scale bar, 10  $\mu\text{m}$ .

(b) The time course of light-triggered cytosol-to-PM translocation of the indicated mCh-CRY2-STIM1ct variants (WT, black; P645N, blue; P645N + PL/KK, red). Cytosolic mCherry fluorescence intensities were used to plot the curves.  $n = 10$  cells. Error bars denote sem.

(c) Photo-triggered  $\text{Ca}^{2+}$  influx in HeLa cells expressing the indicated mCh-CRY2-STIM1ct variants. The half-lives of light-activated  $\text{Ca}^{2+}$  entry were listed on the right.  $n = 45$  cells. Error bars denote sem.

**a**

| Photoactivatable STIMct (GECAs)                               | ON ( $t_{1/2}$ , sec) | OFF ( $t_{1/2}$ , sec) | Related Figures            |
|---------------------------------------------------------------|-----------------------|------------------------|----------------------------|
| CRY2-STIM1 <sub>233-685</sub>                                 | 38.4 ± 2.1            | 320 ± 37.2             | Supplementary Figure 12g-h |
| iLID-STIM1 <sub>233-685</sub> + sspB-STIM1 <sub>233-685</sub> | 28.5 ± 3.2            | 48.6 ± 5.4             | Figure 1e                  |
| CRY2 crosslinking CIBN-STIM1 <sub>233-685</sub>               | 23.4 ± 2.6            | 153.0 ± 26.2           | Figure 1h                  |
| ER-tethered CRY2-STIM1 <sub>233-685</sub>                     | 37.8 ± 5.3            | 97.5 ± 16.5            | Figure 1k                  |
| CRY2-STIM2 <sub>324-833</sub>                                 | 9.3 ± 2.3             | 112 ± 7.4              | Supplementary Figure 12g-h |

**b**

| Reporter              | Agonist             | ER Ca <sup>2+</sup> refilling ( $t_{1/2}$ , sec) | Reference                     |
|-----------------------|---------------------|--------------------------------------------------|-------------------------------|
| R-CEPIA <sub>ER</sub> | Carbachol           | ~ 70                                             | Figure 5C [4]; PMID: 29934936 |
| D1ER                  | ATP, Carbachol, BHQ | ~ 50                                             | Figure 7B [5]; PMID: 22464749 |
| D1ER                  | BHQ                 | ~ 50                                             | Figure 4A [6]; PMID: 21880734 |
| FRET (CFP/YFP-STIM1)  | BHQ                 | ~ 30                                             | Figure 3A [6]; PMID: 21880734 |
| FRET (CFP/YFP-STIM1)  | Histamine, BHQ      | 21.7 ± 2.4 s                                     | Figure 1F [7]; PMID: 17517596 |

**c**

| Reporter             | Agonist        | STIM1 activation ( $t_{1/2}$ , sec) | Reference                     |
|----------------------|----------------|-------------------------------------|-------------------------------|
| FRET (CFP/YFP-STIM1) | BHQ            | ~ 50                                | Figure 1A [3]; PMID: 21880734 |
| FRET (CFP/YFP-STIM1) | Histamine, BHQ | 26.5 ± 2.4 s                        | Figure 1C [4]; PMID: 17517596 |

**Supplementary Figure 19 | Summary of the kinetic features of photoactivatable STIM1ct variants, ER Ca<sup>2+</sup> store refilling and STIM1 activation.**

(a) The activation (on) and deactivation (off) half-lives ( $t_{1/2}$ ) of photoswitchable STIM1ct variants (or genetically-encoded Ca<sup>2+</sup> actuators; GECAs) generated in the study.

(b-c) The reported half-lives ( $t_{1/2}$ ) of ER Ca<sup>2+</sup> store refilling (b) and STIM1 activation.

## Supplementary Table 1. Primers used in this study.

| <b>Fluorescent proteins fused STIM1 fragments</b> |                                                      |
|---------------------------------------------------|------------------------------------------------------|
| STIM1_XhoI_For                                    | cgg ctcgag ATG GAT GTG TGC GCC CGT CTT G             |
| STIM1_342_BamHI_Rev:                              | cgg GGATCCcccgaacctccATACCATGAGCTGTGTGATTC           |
| STIM1_233_XhoI_For                                | cgg CTCGAG GA GGT AGT GGT GGC CAGAACCGT TACTCCAAGGAG |
| STIM1_343_XhoI_For                                | cgg CTCGAG GA GGT AGT GGT GGC GCTCCAGAG GCCCTTCAGAAG |
| STIM1_443_XhoI_For                                | cgg CTCGAG GA GGT AGT GGT GGC AACAACCT GGCATCCACTCA  |
| STIM1_685_EcoRI_Rev                               | cgg gaattc CTA CTT CTT AAG AGG CTT CTT AAA AAT TTT G |
| STIM1_342_EcoRI_Rev                               | Cgg GAATTC cta AGCATACCATGAGCTGTGAGATTC              |
| STIM1_448_EcoRI_Rev                               | Cgg GAATTC CTA GTG GAT GCC AGG GTT GTT GAC AAT       |
| STIM1_38_XhoI_For                                 | cgg CTCGAG GA ggtagt GCCAACTCT GAGGAGTCCAAGGAG       |
| STIM1_129_XhoI_For                                | cgg CTCGAG GA ggtagt GTATAC AATTGGACCGTGGATGAGGTG    |
| STIM1_209_EcoRI_Rev                               | cgg GAATTC CTA ATTATGGCGAGTCAAGAGAGGAGGCCCAAAGAG     |
| STIM1_127_EcoRI_Rev                               | cgg GAATTC CTA TGATGACTTCCATGCCTTCCACAG              |
| <b>Optogenetic Modules fused STIM1 fragments</b>  |                                                      |
| STIM1_BspEI-For                                   | cgg TCCGGA ggtagt ATGGATGTATGCGTC CGTCTTGCC          |
| STIM1_38_BspEI-For                                | cgg TCCGGA ggtagt GCCAACTCT GAGGAGTCCAAGGAG          |
| STIM1_128_BspEI-For                               | cgg TCCGGA ggtagt GTATAC AATTGGACCGTGGATGAGGTG       |
| STIM1_200_BspEI-For                               | cgg TCCGGA ggtagt GGCCTCCTCTTCTG ACTCGC              |
| STIM1_233_BspEI-For                               | Cgg TCCGGA ggtagt CAGAACCGTACTCCAAGGAG               |
| STIM1_238_BspEI-For                               | Cgg TCCGGA ggtagt AAGGAGCACATGAAGAAGATGATG           |
| STIM1_241_BspEI-For                               | Cgg TCCGGA ggtagt ATGAAGAAGATGATGAAGGACTTGGAG        |
| STIM1_244_BspEI-For                               | Cgg TCCGGA ggtagt ATGATGAAGGACTTGGAGGGG              |
| STIM1_248_BspEI-For                               | Cgg TCCGGA ggtagt TTGGAGGGGTTACACCGAGCT              |
| STIM1_251_BspEI-For                               | Cgg TCCGGA ggtagt TTACACCGAGCTGAGCAGAGT              |
| STIM1_252_BspEI-For                               | Cgg TCCGGA ggtagt CACCGAGCTGAGCAGAGTCTG              |
| STIM1_255_BspEI-For                               | Cgg TCCGGA ggtagt GAGCAGAGTCTGCATGACCTT              |
| STIM1_258_BspEI-For                               | Cgg TCCGGA ggtagt CTGCATGACCTTCAGGAAAGG              |
| STIM1_259_BspEI-For                               | Cgg TCCGGA ggtagt CATGACCTTCAGGAAAGGCTG              |
| STIM1_265_BspEI-For                               | Cgg TCCGGA ggtagt CTGCACAAGGCCAGGAGGAG               |
| STIM1_271_BspEI-For                               | Cgg TCCGGA ggtagt GAGCACCGCACAGTGGAGGTG              |
| STIM1_343_BspEI-For                               | Cgg TCCGGA ggtagt GCTCCAGAGGCCCTTCAGAAG              |

|                        |                                                              |
|------------------------|--------------------------------------------------------------|
| STIM1_443_BspEI-For    | Cgg TCCGGA ggtagt AACAAACCTGGCATCCACTCA                      |
| STIM1_671-685-For      | CCGGA ggtagt CGGAAGAAGTTTCCCCTCAAATCTTTAAGAAGCCTCTTAAGAAGT G |
| STIM1_671-685-For      | GATCC ACTTCTTAAGAGGCTTCTTAAAGATTTTGAGGGGAAACTTCTCCGactacc T  |
| STIM1_685_BamHI_Rev    | cgg GGATCC CTA CTT CTT AAG AGG CTT CTT AAA AAT TTT G         |
| STIM1_670_BamHI_Rev    | cgg GGATCC CTA GCCTGGGCTGGAGTCTGTTTC                         |
| STIM1_342_BamHI_Rev    | cgg GGATCC CTA AGCATACCATGAGCTGTGAGATTC                      |
| STIM1_448_BamHI_Rev    | Cgg GGATCC CTA GTG GAT GCC AGG GTT GTT GAC AAT               |
| STIM1_209_BamHI_Rev    | cgg GGATCC CTA ATTATGGCGAGTCAAGAGAGGAGGCCCAAAGAG             |
| STIM1_127_BamHI_Rev    | cgg GGATCC CTA TGATGACTTCCATGCCTTCCACAG                      |
| STIM1_336_HidIII-For   | Cgg AAGCTT GAATCACACAGCTCATGGTATGCT                          |
| STIM1_486_XhoI-Rev     | Cgg CTCGAG CTA GCCACCGTTC CGACACAATCTCCTCATCCATGTC           |
| STIM1_685_XhoI_Rev     | cgg CTCGAG CTA CTT CTT AAG AGG CTT CTT AAA AAT TTT G         |
| BsrGI-ILID-For         | Cgg TGTACA AG CCACCGGTC GCCACC CTGGCAACCACACTGGAACGG         |
| ILID-BsrGI-Rev         | Cgg TGTACA c AAAGTAATTTTCGTCTGTTCCG                          |
| BsrGI-SspB-For         | Cgg TGTACA AG CCACCGGTC GCCACC AGCTCCCCGAAACGCCCTAAGC        |
| SspB-BsrGI-Rev         | Cgg TGTACA c ACCAATATTCAGCTCGTCATA                           |
| BsrGI-CIBN_For         | Cgg TGTACA AG CCACCGGTC ATGAATGGAGCTATA GGAGGTGAC            |
| CIBN-BsrGI-Rev         | Cgg TGTACA c ATGAATATAATCCGTTTTCTCCAA                        |
| <b>STIM1 mutations</b> |                                                              |
| STIM1_335_XhoI_M       | AGGAAAGCAGAGAAGGAGCTCGAGTCTCACAGCTCATGGTAT                   |
| STIM1_445_XmaI_M       | TTCCAGATTGTCAACAACCCCGGGATCCACTCACTGGTGG                     |
| SOAR_Random_F          | cgg CTCGAG TCTCACAGCTCATGGTATGCT                             |
| SOAR_Random_R          | cgg TGAGTGGATCCCGGGGTTGTT                                    |
| STIM1_I383K            | AAGGAGGGGGCTGAGAAGAAAAAAGAAGAGAAACACA                        |
| STIM1_T393F            | AGAAACACACTCTTTGGCTTCTCCACGTGGCCACAGC                        |
| STIM1_P645N            | AGCCGAAACACACGCATTAACCACTGGCTGGCAAGAAG                       |
| STIM1_K684A            | ATCTTTAAGAAGCCTCTTGCGAAG TAGGGATCCACCGGA                     |
| STIM1_P682K            | CTCAAATCTTTAAGAAGAAG CTT AAGAAG TAGGGATCC                    |
| STIM1_L683K            | AAAATCTTTAAGAAGCCTAAA AAGAAGTAGGGATCCACC                     |
| STIM1_PL/KK            | AAAATCTTTAAGAAGAAGAAA AAGAAGTAGGGATCCACC                     |

## Supplementary References

1. Kolossov, V.L. et al. Forster resonance energy transfer-based sensor targeting endoplasmic reticulum reveals highly oxidative environment. *Exp Biol Med (Maywood)* **237**, 652-662 (2012).
2. Morgan, B. et al. Multiple glutathione disulfide removal pathways mediate cytosolic redox homeostasis. *Nat Chem Biol* **9**, 119-125 (2013).
3. Gutscher, M. et al. Real-time imaging of the intracellular glutathione redox potential. *Nat Methods* **5**, 553-559 (2008).
4. Zheng, S.S. et al. Calcium store refilling and STIM activation in STIM- and Orai-deficient cell lines. *Pflug Arch Eur J Phy* **470**, 1555-1567 (2018).
5. Palty, R., Raveh, A., Kaminsky, I., Meller, R. & Reuveny, E. SARAF Inactivates the Store Operated Calcium Entry Machinery to Prevent Excess Calcium Refilling. *Cell* **149**, 425-438 (2012).
6. Shen, W.W., Frieden, M. & Demaurex, N. Local Cytosolic Ca<sup>2+</sup> Elevations Are Required for Stromal Interaction Molecule 1 (STIM1) De-oligomerization and Termination of Store-operated Ca<sup>2+</sup> Entry. *J Biol Chem* **286**, 36448-36459 (2011).
7. Liou, J., Fivaz, M., Inoue, T. & Meyer, T. Live-cell imaging reveals sequential oligomerization and local plasma membrane targeting of stromal interaction molecule 1 after Ca<sup>2+</sup> store depletion. *P Natl Acad Sci USA* **104**, 9301-9306 (2007).
