# Supplementary material for: Optogenetic engineering to probe the molecular choreography of STIM1-mediated cell signaling
Source: PubMed Central journal article supplement (PMC7042325; doi:10.1038/s41467-020-14841-9), 2020-02-25
Supplement: 41467_2020_14841_MOESM3_ESM.pdf [file 41467_2020_14841_MOESM3_ESM.pdf]

## Description of Additional Supplementary Files

File Name: Supplementary Movie 1

Description: **CRY2 as an optical crosslinker to induce CIBN-STIM1ct activation and Ca<sup>2+</sup> influx** (Related to Fig. 1f-h).

Dark-light cycles were applied to HeLa cells transfected with the red Ca<sup>2+</sup> indicator, R-GECO1.2, YFP-CRY2 and YFP-CIBN-STIM1ct (STIM1<sub>233-685</sub>). Shown were fluorescence signals of R-GECO1.2. Cells were exposed to blue light stimulation at 470 nm (4 mW/cm<sup>2</sup>) or kept in the dark after light exposure.

File Name: Supplementary Movie 2

Description: **An optogenetic co-clustering assay to dissect the designed bait-prey interaction** (Related to Fig. 4c-f).

HeLa cells co-expressing the mCherry tagged baits (mCh-CRY2-STIM1ct variants) and YFP tagged preys (YFP-STIM1ct variants) were exposed to blue light (470 nm; 4 mW/cm<sup>2</sup>).

*Top* panel: cells co-expressing B2, CRY2-STIM1<sub>233-448</sub>, CC1-SOAR and P2, YFP- STIM1<sub>233-448</sub>, CC1-SOAR;

*Middle* panel: cells co-expressing CRY2-STIM1<sub>343-448</sub>, SOAR and P4, YFP- STIM1<sub>343-448</sub>, SOAR;

*Bottom* panel: cells co-expressing B3, CRY2-STIM1<sub>233-342</sub>, CC1 and P3, YFP- STIM1<sub>233-342</sub>, CC1.

File Name: Supplementary Movie 3

Description: **Comparison of light induced Ca<sup>2+</sup> influx for mCh-CRY2-STIM1ct variants (WT vs T393F)**.

HeLa-GCaMP6s cells expressing mCh-CRY2-STIM1ct (WT, *left* panel) or mCh-CRY2-STIM1ct (T393F, *right* panel). The *upper* panel showed the merged confocal images of GCaMP6s and mCh-CRY2-STIM1c responding to blue light; The bottom panel showed quantitative analysis of Ca<sup>2+</sup> signals in selected cells (n = 8) after photostimulation. The cells were exposed to the 488-nm excitation laser for photoactivation. Scale bar, 10 μm.

File Name: Supplementary Movie 4

Description: **Light-triggered reversible EB1 binding and cytosol-to-PM translocation of mCh-CRY2-STIM1<sub>443-685</sub>**.

Dark-light cycles were applied to cells transfected with mCh-CRY2-STIM1<sub>443-685</sub>. The blue light stimulation was set at 470 nm with a power density of 4 mW/cm<sup>2</sup>.

File Name: Supplementary Movie 5

Description: **Spatiotemporal control of the cytosol-to-PM translocation of mCh-CRY2-PB (STIM1<sub>671-685</sub>, PL/KK)**.

Repeated light stimulation was sequentially applied to two selected regions in HeLa cells transfected with mCh-CRY2-STIM1<sub>671-685</sub>. Photostimulation at 488 nm was used to activate mCh-CRY2-PB by taking advantage of the FRAP module (with 5% input in the GFP channel) of a Nikon A1R laser scanning confocal microscope.
